# Supplementary material
Source: PubMed Central journal article supplement (PMC9197249)
Supplement: mmc1.pdf [file mmc1.pdf]

# THE LANCET

## Respiratory Medicine

### Supplementary appendix 1

This appendix formed part of the original submission and has been peer reviewed. We post it as supplied by the authors.

Supplement to: Munblit D, Nicholson T, Akrami A, et al. A core outcome set for post-COVID-19 condition in adults for use in clinical practice and research: an international Delphi consensus study. *Lancet Respir Med* 2022; published online June 14. [https://doi.org/10.1016/S2213-2600\(22\)00169-2](https://doi.org/10.1016/S2213-2600(22)00169-2).

## **Core Outcome Set for Research and Clinical Practice in Post COVID-19 Condition (Long COVID): An International Delphi Consensus Study ‘PC-COS’**

Daniel Munblit PhD<sup>1,2,3,\*</sup>, Timothy Nicholson PhD<sup>4,\*</sup>, Athena Akrami PhD<sup>5,6</sup>, Christian Apfelbacher PhD<sup>7</sup>, Jessica Chen BSc<sup>8</sup>, Wouter De Groot PhD<sup>9</sup>, Janet V. Diaz MD<sup>10</sup>, Sarah L. Gorst PhD<sup>11</sup>, Nicola Harman PhD<sup>12</sup>, Alisa Kokorina BSc<sup>13</sup>, Piero Olliaro PhD<sup>14</sup>, Callum Parr BSc<sup>8</sup>, Jacobus Preller MD<sup>15</sup>, Nicoline Schiess MD<sup>16</sup>, Jochen Schmitt PhD<sup>17</sup>, Nina Seylanova MD<sup>18</sup>, Frances Simpson MSc<sup>19</sup>, Allison Tong PhD<sup>20</sup>, Dale M. Needham PhD<sup>21,22,23,\*</sup>, Paula R. Williamson PhD<sup>12,\*</sup> and PC-COS Project Steering Committee

\*Authors contributed equally to the paper.

Apart from joint first and joint last authors who contributed equally, authors are listed in alphabetical order.

### **Table of Contents**

|                                                                                                                   |           |
|-------------------------------------------------------------------------------------------------------------------|-----------|
| <b>PC-COS Project Steering Committee Group Authors .....</b>                                                      | <b>1</b>  |
| <b>Table S1: PC-COS Project Steering Committee.....</b>                                                           | <b>2</b>  |
| <b>Table S2. The list of the Delphi dissemination recipients.....</b>                                             | <b>6</b>  |
| <b>Details of the Modified Delphi Consensus Process .....</b>                                                     | <b>8</b>  |
| <b>Details of Consensus meeting .....</b>                                                                         | <b>8</b>  |
| <b>Table S3. References used for the development of the long list of outcomes. ....</b>                           | <b>9</b>  |
| <b>Table S4. The long list of outcomes used in post-COVID-19 condition studies. ....</b>                          | <b>19</b> |
| <b>Table S5. The list of outcomes presented to the Delphi participants.....</b>                                   | <b>27</b> |
| <b>Table S6. Full details of Delphi participants.....</b>                                                         | <b>29</b> |
| <b>Table S7. Results following two rounds of Delphi and selection of outcomes for the consensus meeting. ....</b> | <b>35</b> |
| <b>Table S8. Attrition between Rounds one and two.....</b>                                                        | <b>42</b> |
| <b>Table S9. Consensus meeting participants. ....</b>                                                             | <b>43</b> |
| <b>Table S10. Delphi process and Consensus meeting results. ....</b>                                              | <b>44</b> |
| <b>Table S11. Participants wishing to be acknowledged. ....</b>                                                   | <b>45</b> |

## PC-COS Project Steering Committee Group Authors

Olalekan Lee Aiyegbusi<sup>1</sup>, Sergey Avdeev<sup>2</sup>, Shinjini Bhatnagar<sup>3</sup>, Anouar Bouraoui<sup>4</sup>, Danilo Buonsenso<sup>5</sup>, Melanie Calvert<sup>1</sup>, Bin Cao<sup>6</sup>, Gail Carson<sup>7</sup>, Jennifer R. Chevinsky<sup>8</sup>, Tarun Dua<sup>4</sup>, Audrey Dunn Galvin<sup>9</sup>, Robert W. Eisinger<sup>10</sup>, Laura Fregonese<sup>11</sup>, Jennifer A. Frontera<sup>12</sup>, Jon Genuneit<sup>13</sup>, Alla Guekht<sup>14</sup>, Shamil Haroon<sup>1</sup>, Margaret Herridge<sup>15</sup>, Catherine L. Hough<sup>16</sup>, Sarah E. Hughes<sup>1</sup>, Frederikus A. Klok<sup>17</sup>, Samuel Knauss<sup>18</sup>, Andrea Lerner<sup>19</sup>, John Marshall<sup>20</sup>, Melina Michelen<sup>21,22</sup>, Srinivas Murthy<sup>23</sup>, Kelly K. O'Brien<sup>24</sup>, Margaret O'Hara<sup>25</sup>, Ann M. Parker<sup>26,27</sup>, Pryanka Relan<sup>4</sup>, Regis G. Rosa<sup>28</sup>, Sharon H. Saydah<sup>29,30</sup>, Janet T. Scott<sup>31</sup>, Archana Seahwag<sup>4</sup>, Malcolm "Calum" G. Semple<sup>32,33</sup>, Bob Siegerink<sup>34</sup>, Louise Sigfrid<sup>35</sup>, Manoj Sivan<sup>36</sup>, Juan Soriano Ortiz<sup>4</sup>, Charitini Stavropoulou<sup>22</sup>, Ramachandran Thiruvengadam<sup>3</sup>, Elizabeth R. Unger<sup>30,37</sup>, Maria Van Kerkhove<sup>4</sup>, Theo Vos<sup>38</sup>, John O. Warner<sup>39</sup>, Sarah Wulf Hanson<sup>38</sup>

1. Institute of Applied Health Research, University of Birmingham, Birmingham, UK
2. Department of Pulmonology, Sechenov First Moscow State Medical University (Sechenov University), Moscow, Russia
3. Maternal and Child Health Program, Translational Health Science and Technology Institute, Faridabad, Delhi, National Capital Region, India
4. WHO, Geneva, Switzerland
5. Department of Woman and Child Health and Public Health, Fondazione Policlinico Universitario A. Gemelli IRCCS, Rome, Italy.
6. China-Japan Friendship Hospital, China
7. University of Oxford, Oxford, UK
8. CDC COVID-19 Emergency Response, USA
9. University of Cork, Cork, Ireland
10. Division of Program Coordination, Planning, and Strategic Initiatives, Office of the Director, NIH, Bethesda, USA
11. European Medicines Agency, the Netherlands
12. New York University Grossman School of Medicine, USA
13. Pediatric Epidemiology, Department of Pediatrics, Medical Faculty, Leipzig University, Leipzig, Germany
14. Research and Clinical Center for Neuropsychiatry, Moscow, Russia
15. Interdepartmental Division of Critical Care Medicine, University of Toronto, Toronto, ON, Canada
16. Oregon Health & Science University, USA
17. Department of Medicine – Thrombosis and Hemostasis, Leiden University Medical Center, Leiden, the Netherlands
18. Charité – Universitätsmedizin Berlin, Berlin, Germany
19. NIH/NIAID, USA
20. University of Toronto, Toronto, Canada
21. ISARIC Global Support Centre, Nuffield Department of Medicine, University of Oxford, Oxford, UK
22. School of Health Sciences, City, University of London, London, UK
23. University of British Columbia, Canada
24. University of Toronto, Canada
25. Long COVID Support, London, UK
26. Outcomes After Critical Illness and Surgery (OACIS) Research Group, Johns Hopkins University, Baltimore, MD, USA
27. Pulmonary and Critical Care Medicine, Department of Medicine, Johns Hopkins University School of Medicine, Baltimore, MD, USA
28. Hospital Moinhos de Vento, Brazil
29. CDC/DDID/NCIRD/DVD, USA
30. CDC COVID-19 Response, USA

31. MRC-University of Glasgow Centre for Virus Research, Glasgow, UK
32. University of Liverpool, Liverpool, UK
33. Alder Hey Children’s Hospital Liverpool, Liverpool, UK
34. Leiden University Medical Center, Leiden, the Netherlands
35. ISARIC Global Support Centre, Centre for Tropical Medicine and Global Health, University of Oxford, Oxford, UK
36. University of Leeds, Leeds, UK
37. CDC/DDID/NCEZID/DHCPP, USA
38. University of Washington, USA
39. Paediatric Infectious Diseases, Imperial College Healthcare NHS Trust, London, UK

**Table S1: PC-COS Project Steering Committee**

| Name            | Middle name | Surname     | Institution                                                                           | Country   | Expertise                                 | Lived experience of Long COVID? |
|-----------------|-------------|-------------|---------------------------------------------------------------------------------------|-----------|-------------------------------------------|---------------------------------|
| EUROPEAN REGION |             |             |                                                                                       |           |                                           |                                 |
| Daniel          |             | Munblit     | Sechenov University/Imperial College London                                           | Russia/UK | Allergy, Pediatrics                       |                                 |
| Alla            |             | Guekht      | Research and Clinical Centre for Neuropsychiatry                                      | Russia    | Neurology                                 |                                 |
| Tim             |             | Nicholson   | King’s College London                                                                 | UK        | Neuropsychiatry                           |                                 |
| Paula           |             | Williamson  | University of Liverpool                                                               | UK        | Methodology, COS development              |                                 |
| Jochen          |             | Schmitt     | University of Dresden                                                                 | Germany   | Methodology, COS development              |                                 |
| Christian       |             | Apfelbacher | University of Magdeburg                                                               | Germany   | Epidemiology, COS development             |                                 |
| Piero           |             | Olliaro     | University of Oxford                                                                  | UK        | Public Health, Infectious diseases        |                                 |
| Malcolm “Calum” | G.          | Semple      | University of Liverpool; Alder Hey Children’s Hospital Liverpool                      | UK        | Respiratory and Infectious Diseases       | No                              |
| John            | O.          | Warner      | Imperial College London                                                               | UK        | Allergy, Respiratory Medicine, Pediatrics |                                 |
| Louise          |             | Sigfrid     | University of Oxford                                                                  | UK        | Public Health, Infectious diseases        | No                              |
| Janet           | T.          | Scott       | MRC-University of Glasgow Centre for Virus Research                                   | UK        | Infectious Diseases                       |                                 |
| Audrey          |             | DunnGalvin  | University of Cork                                                                    | Ireland   | Medical Psychology                        |                                 |
| Jon             |             | Genuneit    | Pediatric Epidemiology, Department of Pediatrics, Medical Faculty, Leipzig University | Germany   | Epidemiology                              |                                 |
| Frances         |             | Simpson     | Coventry University                                                                   | UK        | Psychology                                |                                 |

|                        |     |              |                                                                                                                            |                 |                                                   |     |
|------------------------|-----|--------------|----------------------------------------------------------------------------------------------------------------------------|-----------------|---------------------------------------------------|-----|
| Danilo                 |     | Buonsenso    | Department of Woman and Child Health and Public Health, Fondazione Policlinico Universitario A. Gemelli IRCCS, Rome, Italy | Italy           | Pediatrics, Infectious Diseases                   | No  |
| Manoj                  |     | Sivan        | University of Leeds                                                                                                        | UK              | Rehabilitation Medicine                           |     |
| Bob                    |     | Siegerink    | Leiden University Medical Center                                                                                           | The Netherlands | Epidemiology                                      | No  |
| Frederikus             | A.  | Klok         | Department of Medicine – Thrombosis and Hemostasis, Leiden University Medical Center                                       | The Netherlands | Vascular Medicine, Cardiology                     |     |
| Sergey                 |     | Avdeev       | Sechenov University                                                                                                        | Russia          | Respiratory                                       |     |
| Charitini              |     | Stavropoulou | City, University of London                                                                                                 | UK              | Health Services Research                          | No  |
| Melina                 |     | Michelen     | University of Oxford                                                                                                       | UK              | Public Health, Infectious diseases                |     |
| Olalekan               | Lee | Aiyegbusi    | University of Birmingham                                                                                                   | UK              | Outcomes Methodology                              |     |
| Melanie                |     | Calvert      | University of Birmingham                                                                                                   | UK              | Outcomes Methodology                              |     |
| Sarah                  | E.  | Hughes       | University of Birmingham                                                                                                   | UK              | Outcomes Methodology                              |     |
| Shamil                 |     | Haroon       | University of Birmingham                                                                                                   | UK              | Public Health, Primary Care, Respiratory Medicine | No  |
| Sarah                  |     | Gorst        | University of Liverpool                                                                                                    | UK              | Epidemiology                                      |     |
| Nicola                 |     | Harman       | University of Liverpool                                                                                                    | UK              | Epidemiology                                      |     |
| Laura                  |     | Fregonese    | European Medicines Agency                                                                                                  | NL              | Respiratory, Immunology, Regulatory Science       |     |
| Gail                   |     | Carson       | University of Oxford                                                                                                       | UK              |                                                   |     |
| Athena                 |     | Akrami       | UCL                                                                                                                        | UK              | Neuroscience                                      | Yes |
| Samuel                 |     | Knauss       | Charité – Universitätsmedizin Berlin                                                                                       | Germany         | Neurology with Experimental Neurology             |     |
| Margaret               |     | O'Hara       | Long Covid Support                                                                                                         | UK              | Patient and Public Involvement in Research        | Yes |
| Nina                   |     | Seylanova    | Sechenov University                                                                                                        | Russia          | ECR                                               | No  |
| Alisa                  |     | Kokorina     | Pirogov Medical University                                                                                                 | Russia          | ECR                                               |     |
| Jessica                |     | Chen         | Imperial College London                                                                                                    | UK              | ECR                                               |     |
| Callum                 |     | Parr         | Imperial College London                                                                                                    | UK              | ECR                                               |     |
| REGION OF THE AMERICAS |     |              |                                                                                                                            |                 |                                                   |     |
| John                   |     | Marshall     | University of Toronto                                                                                                      | Canada          | Surgery, Critical Care                            |     |
| Margaret               |     | Herridge     | University of Toronto                                                                                                      | Canada          | Critical Care, Pulmonary Medicine                 |     |

|                         |    |               |                                                       |             |                                                                                     |    |
|-------------------------|----|---------------|-------------------------------------------------------|-------------|-------------------------------------------------------------------------------------|----|
| Srinivas                |    | Murthy        | University of British Columbia                        | Canada      | Critical Care, Paediatrics, Infectious Diseases                                     |    |
| Dale                    | M. | Needham       | John's Hopkins University                             | USA         | Critical Care, Physical Medicine and Rehabilitation                                 | No |
| Theo                    |    | Vos           | University of Washington                              | USA         | Global Health, Epidemiology                                                         |    |
| Sarah                   |    | Wulf Hanson   | University of Washington                              | USA         |                                                                                     |    |
| Ann                     | M. | Parker        | John's Hopkins University                             | USA         | Critical Care, Pulmonary Medicine                                                   | No |
| Kelly                   | K. | O'Brien       | University of Toronto                                 | Canada      | Rehabilitation, Physical Therapy, Clinical Epidemiology, Measurement                | No |
| Andrea                  |    | Lerner        | NIH/NIAID                                             | USA         | Infectious Diseases                                                                 |    |
| Jennifer                | R. | Chevinsky     | CDC COVID-19 Emergency Response                       | USA         | Epidemiology, Population Health, Preventive Medicine                                |    |
| Robert                  | W. | Eisinger      | NIH/Office of the Director                            | USA         | Virology                                                                            |    |
| Catherine               | L. | Hough         | Oregon Health & Science University                    | USA         | Pulmonary, Allergy, and Critical Care Medicine                                      | No |
| Sharon                  | H. | Saydah        | CDC/DDID/NCIRD/DVD; CDC COVID-19 Response             | USA         | Epidemiology                                                                        |    |
| Elizabeth               | R. | Unger         | CDC/DDID/NCEZID/DHCPP; CDC COVID-19 Response          | USA         | Public Health                                                                       | No |
| Jennifer                | A. | Frontera      | New York University Grossman School of Medicine       | USA         | Neurocritical care                                                                  |    |
| Regis                   | G. | Rosa          | Hospital Moinhos de Vento                             | Brazil      | Critical Care, Respiratory Medicine                                                 | No |
| WESTERN PACIFIC REGION  |    |               |                                                       |             |                                                                                     |    |
| Allison                 |    | Tong          | The University of Sydney                              | Australia   | Public Health                                                                       |    |
| Bin                     |    | Cao           | China-Japan Friendship Hospital                       | China       | Pulmonology                                                                         |    |
| SOUTH-EAST ASIAN REGION |    |               |                                                       |             |                                                                                     |    |
| Shinjini                |    | Bhatnagar     | Translational Health Science and Technology Institute | India       | Maternal and child health, Epidemiology                                             | No |
| Ramachandran            |    | Thiruvengadam | Translational Health Science and Technology Institute | India       | Maternal and child health, Epidemiology                                             | No |
| WHO                     |    |               |                                                       |             |                                                                                     |    |
| Janet                   |    | Diaz          | WHO                                                   | Switzerland | Critical Care, Pulmonary Medicine, Global Health                                    |    |
| Archana                 |    | Seahwag       | WHO                                                   | Switzerland | Global Health, Tropical Medicine, Epidemiology, Health Systems, Access to Medicines | No |
| Wouter                  |    | De Groote     | WHO                                                   | Switzerland | Global Health, Rehabilitation Medicine                                              | No |

|          |  |               |     |             |                                                    |  |
|----------|--|---------------|-----|-------------|----------------------------------------------------|--|
| Jacobus  |  | Preller       | WHO | Switzerland |                                                    |  |
| Nicoline |  | Schiess       | WHO | Switzerland | Global health, Neurology                           |  |
| Anouar   |  | Bouraoui      | WHO |             |                                                    |  |
| Maria    |  | Van Kerkhove  | WHO | Switzerland | Epidemiology                                       |  |
| Tarun    |  | Dua           | WHO |             |                                                    |  |
| Pryanka  |  | Relan         | WHO | Switzerland | Emergency Care, Tropical Medicine,<br>Epidemiology |  |
| Juan     |  | Soriano Ortiz | WHO |             |                                                    |  |

**Table S2. The list of the Delphi dissemination recipients.**

|                                                                                                                              |                                  |
|------------------------------------------------------------------------------------------------------------------------------|----------------------------------|
| Groups contacted by study group                                                                                              |                                  |
| Long COVID ACTS (Autonomous Communities Together Spain)                                                                      | Patient advocacy group           |
| Covid-19 Longhailer Advocacy Project                                                                                         | Patient advocacy group           |
| Long COVID Alliance                                                                                                          | Patient advocacy group           |
| Stroke Association Supportnetwork-Ghana                                                                                      | Patient advocacy group           |
| Long Covid Italia                                                                                                            | Patient advocacy group           |
| Untypical Coronavirus (post-covid) Public Group, <i>Russian Patients Group</i>                                               | Patient advocacy group           |
| Long Covid Support                                                                                                           | Patient advocacy group           |
| Long Covid Physio                                                                                                            | Patient advocacy group           |
| PatientLed research                                                                                                          | Patient advocacy group           |
| Clinician-patient UK Facebook group                                                                                          | Patient advocacy group           |
| NHS England                                                                                                                  | Healthcare networks              |
| UK clinics in South East London                                                                                              | Healthcare networks              |
| US Clinics (details of clinicians running Long COVID clinics were collected from a wide range of collaborators and networks) | Healthcare networks              |
| Australian networks (Provided by Dr Allison Tong)                                                                            | Healthcare networks              |
| NIH CONNECTS (at Vanderbilt University)                                                                                      | Healthcare networks              |
| NIH RECOVER (at NYU Langone)                                                                                                 | Healthcare networks              |
| NICE (The National Institute for Health and Care Excellence)                                                                 | Healthcare networks              |
| Zhongnan Hospital of Wuhan University                                                                                        | Healthcare networks              |
| ISARIC (International Severe Acute Respiratory and emerging Infection Consortium) Leads                                      | Healthcare and research networks |
| Global Burden of Disease                                                                                                     | Healthcare and research networks |



|                                                                                                |                                                          |
|------------------------------------------------------------------------------------------------|----------------------------------------------------------|
| NIHR Long COVID Working Group                                                                  | Healthcare networks                                      |
| COMET                                                                                          | Core Outcome Measures in Effectiveness Trials Initiative |
| COVID-END Community                                                                            | Researchers community                                    |
| Cochrane Collaboration                                                                         | Researchers community                                    |
| Lead authors of studies identified in systematic review work, including trial registry entries |                                                          |
| Recipients of WHO Post COVID COS distribution                                                  |                                                          |
| Recipients of WHO Neuro distribution                                                           |                                                          |

### **Details of the Modified Delphi Consensus Process**

Relevant stakeholders were identified via published studies, international organisations (e.g. WHO, ISARIC) and patient organisations and were invited to take part in the Delphi process either by direct email, including a direct link to join the consensus process, from the study team or from relevant patient or professional organisations. Patients from “Long COVID clinical services” were also sent email invitations. Calls for participation were also disseminated via international and local patient organisations and large private “Long COVID” social media groups (see appendix p 25). Relevant stakeholder group descriptions and a contact email were also provided on a study website (<https://www.pc-cos.org>). These additional stakeholders received Delphi registration links after eligibility confirmation by study team members (NSe, AK) and, if needed, discussion with the ‘core group’.

Reminder emails were sent to registered participants, who had not yet completed the survey, at 1 week and 2 weeks after survey launch. In the first Delphi round participants were given information describing the objective of a COS and this project, and then provided with the list of outcomes (accompanied with text providing a simple description for each outcome (see appendix p 27)) and were asked to rate their importance for inclusion in the COS. Participants were also asked to suggest any additional important outcomes. Any additional outcomes submitted were reviewed by the ‘core group’ to ensure no redundancy with original outcomes before inclusion in the second round.

In the second round of the Delphi process, participants were shown their prior rating from the first round, together with ratings of each of the three stakeholder groups (presented as the distribution of 1-9 ratings for each outcome) and asked to consider this information and again rate the outcome using the 1-9 scale. Only participants rating 50% or more of the outcomes in the first round were invited to the second survey. All outcomes from the first round were carried through to the second round. Reminder emails, highlighting the importance of completing the second round, were sent at regular intervals to participants who had not submitted their responses.

### **Details of Consensus meeting**

Participants completing both rounds of the Delphi survey were eligible to participate and were asked to express their interest during the online Delphi process. These expressions of interest were considered to help assure distribution of attendees across the stakeholder groups and international representation. There were 27 voting participants who agreed to take part. There were only five health care professionals or researchers with post COVID-19 condition who agreed to take part; this was not sufficiently large for consensus-related voting as a separate stakeholder group so they were asked to select which of the other two groups they would be most appropriate to join; one joined the health care professionals or researchers group, and four joined the patient group. These final two stakeholder groups had the following composition: 12 Patients (7 UK, 1 Ireland, 1 Greece, 1 Belgian, 1 Spain, 1 USA), 15 health care professionals/researchers (2 USA, 2 India, 1 UK, 1 Russia, 1 Chile, 1 Switzerland, 1 Belgium, 1 Brazil, 1 Norway, 1 Canada, 1 Sweden, 1 Nigeria, 1 Ghana). Prior to attending the meeting, participants received background information and a copy of their own ratings from the Delphi survey and a summary of outcomes that would be discussed at the meeting. People with lived experience and their carers were also invited to attend a pre-meeting, led by the COMET Patient and Public Coordinator, where they were provided with further information about the purpose of COS, what to expect at the consensus meeting and had the opportunity to ask questions.

**Table S3. References used for the development of the long list of outcomes.**

**i. References suggested by the Steering Committee members**

|    | Document type     |                                                                                                                                                                                                                                                                                                                                          |
|----|-------------------|------------------------------------------------------------------------------------------------------------------------------------------------------------------------------------------------------------------------------------------------------------------------------------------------------------------------------------------|
| 1  | Draft             | ISARIC’s Characterising long term Covid-19: a living systematic review, M. Michelen et al.                                                                                                                                                                                                                                               |
| 2  | Draft             | Therapies for Long COVID in non-hospitalised individuals, (TLC) Study Group                                                                                                                                                                                                                                                              |
| 3  | Article           | Al-Aly, Z., Xie, Y. & Bowe, B. High-dimensional characterization of post-acute sequelae of COVID-19. <i>Nature</i> 594, 259–264 (2021). <a href="https://doi.org/10.1038/s41586-021-03553-9">https://doi.org/10.1038/s41586-021-03553-9</a>                                                                                              |
| 4  | Article           | Nalbandian, A., Sehgal, K., Gupta, A. et al. Post-acute COVID-19 syndrome. <i>Nat Med</i> 27, 601–615 (2021). <a href="https://doi.org/10.1038/s41591-021-01283-z">https://doi.org/10.1038/s41591-021-01283-z</a>                                                                                                                        |
| 5  | Draft             | Long COVID outcome measures (shared by T, Nicholson)                                                                                                                                                                                                                                                                                     |
| 6  | CRF               | Global COVID-19 Clinical Platform Case Report Form (CRF) for Post COVID condition (Post COVID-19 CRF), WHO                                                                                                                                                                                                                               |
| 7  | Article           | Taquet M, Geddes JR, Husain M, Luciano S, Harrison PJ. 6-month neurological and psychiatric outcomes in 236 379 survivors of COVID-19: a retrospective cohort study using electronic health records. <i>Lancet Psychiatry</i> . 2021;8(5):416-427. doi:10.1016/S2215-0366(21)00084-5                                                     |
| 8  | Article           | Ayoubkhani D, Khunti K, Nafilyan V, et al. Post-covid syndrome in individuals admitted to hospital with covid-19: retrospective cohort study. <i>BMJ</i> . 2021;372:n693. Published 2021 Mar 31. doi:10.1136/bmj.n693                                                                                                                    |
| 9  | National Guidance | National guidance for post-COVID syndrome assessment clinics (UK)                                                                                                                                                                                                                                                                        |
| 10 | Draft             | Proposed Epidemiologic Phenotypes for Post-COVID Conditions: Classification of Illness Beyond Four Weeks of Acute Infection                                                                                                                                                                                                              |
| 11 | Viewpoint         | Olliaro PL. An integrated understanding of long-term sequelae after acute COVID-19. <i>Lancet Respir Med</i> . 2021;9(7):679-680. doi:10.1016/S2213-2600(21)00206-X                                                                                                                                                                      |
| 12 | Article           | Wu X, Liu X, Zhou Y, et al. 3-month, 6-month, 9-month, and 12-month respiratory outcomes in patients following COVID-19-related hospitalisation: a prospective study. <i>Lancet Respir Med</i> . 2021;9(7):747-754. doi:10.1016/S2213-2600(21)00174-0                                                                                    |
| 13 | Preprint          | J. Rogers et al. The neurology and neuropsychiatry of COVID-19: a systematic review and meta-analysis of the early literature reveals frequent CNS manifestations and key emerging narratives, <a href="https://www.medrxiv.org/content/10.1101/2021.02.24.21252335v1">https://www.medrxiv.org/content/10.1101/2021.02.24.21252335v1</a> |
| 14 | Article           | Machado FVC, Meys R, Delbressine JM, et al. Construct validity of the Post-COVID-19 Functional Status Scale in adult subjects with COVID-19. <i>Health Qual Life Outcomes</i> . 2021;19(1):40. Published 2021 Feb 3. doi:10.1186/s12955-021-01691-2                                                                                      |
| 15 | Preprint          | H. Davis et al. Characterizing Long COVID in an International Cohort: 7 Months of Symptoms and Their Impact. <a href="https://www.medrxiv.org/content/10.1101/2020.12.24.20248802v2">https://www.medrxiv.org/content/10.1101/2020.12.24.20248802v2</a>                                                                                   |
| 16 | Preprint          | S. Lopez-Leon et al. More than 50 Long-term effects of COVID-19: a systematic review and meta-analysis. <a href="https://www.medrxiv.org/content/10.1101/2021.01.27.21250617v2">https://www.medrxiv.org/content/10.1101/2021.01.27.21250617v2</a>                                                                                        |
|    |                   | <b>ii. References from ISARIC Living Systematic Review (1)</b>                                                                                                                                                                                                                                                                           |
| 1  | Article           | Greenhalgh T, Knight M, A’Court C, et al. Management of post-acute covid-19 in primary care. <i>BMJ</i> 2020;370. doi:10.1136/bmj.m3026                                                                                                                                                                                                  |
| 2  | Article           | Sudre CH, Murray B, Varsavsky T, et al. Attributes and predictors of long COVID. <i>Nat Med</i> 2021;27:626–31. doi:10.1038/s41591-021-01292-y                                                                                                                                                                                           |
| 3  | Article           | Zhang J, Xu J, Zhou S, et al. The characteristics of 527 discharged COVID-19 patients undergoing long-term follow-up in China. <i>Int J Infect Dis IJID Off Publ Int Soc Infect Dis</i> 2021;104:685–92. doi:10.1016/j.ijid.2021.01.064                                                                                                  |
| 4  | Article           | Petersen MS, Kristiansen MF, Hanusson KD, et al. Long COVID in the Faroe Islands: A Longitudinal Study Among Nonhospitalized Patients. <i>Clin Infect Dis</i> Published Online First: 30 November 2020. doi:10.1093/cid/ciaa1792                                                                                                         |
| 5  | Article           | Nguyen NN, Hoang VT, Lagier J-C, et al. Long-term persistence of olfactory and gustatory disorders in COVID-19 patients. <i>Clin Microbiol Infect Off Publ Eur Soc Clin Microbiol Infect Dis</i> Published Online First: 5 January 2021. doi:10.1016/j.cmi.2020.12.021                                                                   |
| 6  | Article           | Qu G, Zhen Q, Wang W, et al. Health-related quality of life of COVID-19 patients after discharge: A multicenter follow-up study. <i>J Clin Nurs</i> ;n/a. doi: <a href="https://doi.org/10.1111/jocn.15733">https://doi.org/10.1111/jocn.15733</a>                                                                                       |

|    |         |                                                                                                                                                                                                                                                                                                                                                  |
|----|---------|--------------------------------------------------------------------------------------------------------------------------------------------------------------------------------------------------------------------------------------------------------------------------------------------------------------------------------------------------|
| 7  | Article | Logue JK, Franko NM, McCulloch DJ, et al. Sequelae in Adults at 6 Months After COVID-19 Infection. <i>JAMA Netw Open</i> 2021;4:e210830. doi:10.1001/jamanetworkopen.2021.0830                                                                                                                                                                   |
| 8  | Article | Nugent J, Aklilu A, Yamamoto Y, et al. Assessment of Acute Kidney Injury and Longitudinal Kidney Function After Hospital Discharge Among Patients With and Without COVID-19. <i>JAMA Netw Open</i> 2021;4:e211095. doi:10.1001/jamanetworkopen.2021.1095                                                                                         |
| 9  | Article | Arnold DT, Hamilton FW, Milne A, et al. Patient outcomes after hospitalisation with COVID-19 and implications for follow-up: results from a prospective UK cohort. <i>Thorax</i> 2021;76:399–401. doi:10.1136/thoraxjnl-2020-216086                                                                                                              |
| 10 | Article | Blanco J-R, Cobos-Ceballos M-J, Navarro F, et al. Pulmonary long-term consequences of COVID19 infections after hospital discharge. <i>Clin Microbiol Infect</i> 2021;0. doi:10.1016/j.cmi.2021.02.019                                                                                                                                            |
| 11 | Article | Sykes DL, Holdsworth L, Jawad N, et al. Post-COVID-19 Symptom Burden: What is Long-COVID and How Should We Manage It? <i>Lung</i> 2021;199:113–9. doi:10.1007/s00408-021-00423-z                                                                                                                                                                 |
| 12 | Article | Jacobson KB, Rao M, Bonilla H, et al. Patients with uncomplicated COVID-19 have long-term persistent symptoms and functional impairment similar to patients with severe COVID-19: a cautionary tale during a global pandemic. <i>Clin Infect Dis Off Publ Infect Dis Soc Am</i> Published Online First: 7 February 2021. doi:10.1093/cid/ciab103 |
| 13 | Article | Anastasio F, Barbuto S, Scarnecchia E, et al. Medium-term impact of COVID-19 on pulmonary function, functional capacity and quality of life. <i>Eur Respir J</i> Published Online First: 11 February 2021. doi:10.1183/13993003.04015-2020                                                                                                       |
| 14 | Article | Bellan M, Soddu D, Balbo PE, et al. Respiratory and Psychophysical Sequelae Among Patients With COVID-19 Four Months After Hospital Discharge. <i>JAMA Netw Open</i> 2021;4:e2036142. doi:10.1001/jamanetworkopen.2020.36142                                                                                                                     |
| 15 | Article | Xu J, Zhou M, Luo P, et al. Plasma metabolomic profiling of patients recovered from COVID-19 with pulmonary sequelae 3 months after discharge. <i>Clin Infect Dis Off Publ Infect Dis Soc Am</i> Published Online First: 17 February 2021. doi:10.1093/cid/ciab147                                                                               |
| 16 | Article | Xiong Q, Xu M, Li J, et al. Clinical sequelae of COVID-19 survivors in Wuhan, China: a singlecentre longitudinal study. <i>Clin Microbiol Infect Off Publ Eur Soc Clin Microbiol Infect Dis</i> 2021;27:89–95. doi:10.1016/j.cmi.2020.09.023                                                                                                     |
| 17 | Article | Weng J, Li Y, Li J, et al. Gastrointestinal sequelae 90 days after discharge for COVID-19. <i>Lancet Gastroenterol Hepatol</i> 2021;6:344–6. doi:10.1016/S2468-1253(21)00076-5                                                                                                                                                                   |
| 18 | Article | Han X, Fan Y, Alwalid O, et al. Six-month Follow-up Chest CT Findings after Severe COVID-19 Pneumonia. <i>Radiology</i> 2021;299:E177–86. doi:10.1148/radiol.2021203153                                                                                                                                                                          |
| 19 | Article | Klein H, Asseo K, Kami N, et al. Onset, duration and unresolved symptoms, including smell and taste changes, in mild COVID-19 infection: a cohort study in Israeli patients. <i>Clin Microbiol Infect</i> 2021;27:769–74. doi:10.1016/j.cmi.2021.02.008                                                                                          |
| 20 | Article | Sonnweber T, Sahanic S, Pizzini A, et al. Cardiopulmonary recovery after COVID-19 – an observational prospective multi-center trial. <i>Eur Respir J</i> Published Online First: 1 January 2020. doi:10.1183/13993003.03481-2020                                                                                                                 |
| 21 | Article | Méndez R, Latorre A, González-Jiménez P, et al. Reduced Diffusion Capacity in COVID-19 Survivors. <i>Ann Am Thorac Soc</i> Published Online First: 20 January 2021. doi:10.1513/AnnalsATS.202011-1452RL                                                                                                                                          |
| 22 | Article | Rass V, Beer R, Josef Schieffcker A, et al. Neurological outcome and quality of life three months after COVID-19: a prospective observational cohort study. <i>Eur J Neurol</i> Published Online First: 7 March 2021. doi:10.1111/ene.14803                                                                                                      |
| 23 | Article | Sibila O, Albacar N, Perea L, et al. Lung Function sequelae in COVID-19 Patients 3 Months After Hospital Discharge. <i>Arch Bronconeumol</i> 2021;57:59–61. doi:10.1016/j.arbres.2021.01.036                                                                                                                                                     |
| 24 | Article | Zhang D, Zhang C, Li X, et al. Thin-section computed tomography findings and longitudinal variations of the residual pulmonary sequelae after discharge in patients with COVID-19: a shortterm follow-up study. <i>Eur Radiol</i> Published Online First: 11 March 2021. doi:10.1007/s00330-021-07799-9                                          |
| 25 | Article | Qin W, Chen S, Zhang Y, et al. Diffusion Capacity Abnormalities for Carbon Monoxide in Patients with COVID-19 At Three-Month Follow-up. <i>Eur Respir J</i> Published Online First: 11 February 2021. doi:10.1183/13993003.03677-2020                                                                                                            |
| 26 | Article | Alharthy A, Abuhamdah M, Balhamar A, et al. Residual Lung Injury in Patients Recovering From COVID-19 Critical Illness: A Prospective Longitudinal Point-of-Care Lung Ultrasound Study. <i>J Ultrasound Med;n/a</i> . doi:https://doi.org/10.1002/jum.15563                                                                                      |
| 27 | Article | Parente-Arias P, Barreira-Fernandez P, Quintana-Sanjuas A, et al. Recovery rate and factors associated with smell and taste disruption in patients with coronavirus disease 2019. <i>Am J Otolaryngol</i> 2021;42:102648. doi:10.1016/j.amjoto.2020.102648                                                                                       |
| 28 | Article | L Huang TZ P Zhao, D Tang. Cardiac involvement in patients recovered from COVID-2019 identified using magnetic resonance imaging. <i>JACC ...</i> Published Online First: 2020.https://imaging.onlinejacc.org/content/early/2020/07/30/j.cimg.2020.05.004?versioned=t rue                                                                        |
| 29 | Article | Gherlone EF, Polizzi E, Tetè G, et al. Frequent and Persistent Salivary Gland Ectasia and Oral Disease After COVID-19. <i>J Dent Res</i> 2021;100:464–71. doi:10.1177/0022034521997112                                                                                                                                                           |

|    |          |                                                                                                                                                                                                                                                                                                              |
|----|----------|--------------------------------------------------------------------------------------------------------------------------------------------------------------------------------------------------------------------------------------------------------------------------------------------------------------|
| 30 | Article  | Hopkins C, Surda P, Vaira LA, et al. Six month follow-up of self-reported loss of smell during the COVID-19 pandemic. <i>Rhinology</i> 2021;59:26–31. doi:10.4193/Rhin20.544                                                                                                                                 |
| 31 | Article  | Simani L, Ramezani M, Darazam IA, et al. Prevalence and correlates of chronic fatigue syndrome and post-traumatic stress disorder after the outbreak of the COVID-19. <i>J Neurovirol</i> 2021;27:154–9. doi:10.1007/s13365-021-00949-1                                                                      |
| 32 | Article  | Venturelli S, Benatti SV, Casati M, et al. Surviving COVID-19 in Bergamo province: a post-acute outpatient re-evaluation. <i>Epidemiol Infect</i> 2021;149:e32. doi:10.1017/S0950268821000145                                                                                                                |
| 33 | Article  | Lerum TV, Aaløkken TM, Brønstad E, et al. Dyspnoea, lung function and CT findings three months after hospital admission for COVID-19. <i>Eur Respir J</i> Published Online First: 1 January 2020. doi:10.1183/13993003.03448-2020                                                                            |
| 34 | Article  | Taboada M, Cariñena A, Moreno E, et al. Post-COVID-19 functional status six-months after hospitalization. <i>J Infect</i> 2021;82:e31–3. doi:10.1016/j.jinf.2020.12.022                                                                                                                                      |
| 35 | Article  | Baricich A, Borg MB, Cuneo D, et al. Midterm functional sequelae and implications in rehabilitation after COVID19. A cross-sectional study. <i>Eur J Phys Rehabil Med</i> 2021.                                                                                                                              |
| 36 | Article  | Suárez-Robles M, Iguaran-Bermúdez MDR, García-Klepizg JL, et al. Ninety days posthospitalization evaluation of residual COVID-19 symptoms through a phone call check list. <i>Pan Afr Med J</i> 2020;37:289. doi:10.11604/pamj.2020.37.289.27110                                                             |
| 37 | Article  | Garrigues E, Janvier P, Kherabi Y, et al. Post-discharge persistent symptoms and health-related quality of life after hospitalization for COVID-19. <i>J Infect</i> 2020;81:e4–6. doi:10.1016/j.jinf.2020.08.029                                                                                             |
| 38 | Article  | Doyle AJ, Thomas W, Retter A, et al. Updated hospital associated venous thromboembolism outcomes with 90-days follow-up after hospitalisation for severe COVID-19 in two UK critical care units. <i>Thromb Res</i> 2020;196:454–6. doi:10.1016/j.thromres.2020.10.007                                        |
| 39 | Article  | Einvik G, Dammen T, Ghanima W, et al. Prevalence and Risk Factors for Post-Traumatic Stress in Hospitalized and Non-Hospitalized COVID-19 Patients. <i>Int J Environ Res Public Health</i> 2021;18. doi:10.3390/ijerph18042079                                                                               |
| 40 | Article  | Stavem K, Ghanima W, Olsen MK, et al. Persistent symptoms 1.5–6 months after COVID-19 in non-hospitalised subjects: a population-based cohort study. <i>Thorax</i> 2021;76:405–7. doi:10.1136/thoraxjnl-2020-216377                                                                                          |
| 41 | Article  | Huang C, Huang L, Wang Y, et al. 6-month consequences of COVID-19 in patients discharged from hospital: a cohort study. <i>The Lancet</i> 2021;397:220–32. doi:10.1016/S0140-6736(20)32656-8                                                                                                                 |
| 42 | Article  | Mazza MG, Palladini M, De Lorenzo R, et al. Persistent psychopathology and neurocognitive impairment in COVID-19 survivors: Effect of inflammatory biomarkers at three-month follow-up. <i>Brain Behav Immun</i> 2021;94:138–47. doi:10.1016/j.bbi.2021.02.021                                               |
| 43 | Article  | Grist JT, Chen M, Collier GJ, et al. Hyperpolarized 129Xe MRI Abnormalities in Dyspneic Participants 3 Months after COVID-19 Pneumonia: Preliminary Results. <i>Radiology</i> 2021;:210033. doi:10.1148/radiol.2021210033                                                                                    |
| 44 | Article  | Wang EY, Mao T, Klein J, et al. Diverse Functional Autoantibodies in Patients with COVID-19. <i>Nature</i> Published Online First: 19 May 2021. doi:10.1038/s41586-021-03631-y                                                                                                                               |
| 45 | Article  | de Lusignan S, Lopez Bernal J, Zambon M, et al. Emergence of a Novel Coronavirus (COVID-19): Protocol for Extending Surveillance Used by the Royal College of General Practitioners Research and Surveillance Centre and Public Health England. <i>JMIR Public Health Surveill</i> 2020;6. doi:10.2196/18606 |
| 46 | Preprint | Ladds E, Rushforth A, Wiering S, et al. Persistent symptoms after Covid-19: qualitative study of 114 “long Covid” patients and draft quality criteria for services. <i>medRxiv</i> 2020;:2020.10.13.20211854. doi:10.1101/2020.10.13.20211854                                                                |

**ii. References from ISARIC Living Systematic Review (2)**

|   |          |                                                                                                                                                                                                                                    |
|---|----------|------------------------------------------------------------------------------------------------------------------------------------------------------------------------------------------------------------------------------------|
| 1 | Preprint | Arnold DT, Milne A, Staddon L, Maskell NA. Are vaccines safe in patients with Long COVID? A prospective observational study. <i>medRxiv</i> . 2021.                                                                                |
| 2 | Preprint | Bliddal S, Banasik K, Pedersen OB, Nissen I. Acute and persistent symptoms in non-hospitalized PCR-confirmed COVID-19 patients. <i>medRxiv</i> . 2021.                                                                             |
| 3 | Article  | Bonnesen B, Toennesen LL, Rasmussen KB, Nessar R, Nielsen HB, Hildebrandt T, et al. Early improvements in pulmonary function after severe COVID-19 requiring mechanical ventilation. <i>Infect Dis (Lond)</i> . 2020;53(3):218-21. |
| 4 | Article  | Cao J, Wei W, Chen X, Ryu JH, Hu X. Outcomes of Recovered COVID-19 Patients: 6 Months of Sequential Observations at a Designated Tertiary Center. 2021.                                                                            |
| 5 | Preprint | Chioh FWJ, Fong SW, Young B, Wu KX, Siau A. Convalescent COVID-19 patients are susceptible to endothelial dysfunction due to persistent immune activation. <i>medRxiv</i> . 2020.                                                  |
| 6 | Preprint | Clavario P, Marzo VD, Lotti R, Barbara C, Porcile A. Assessment of functional capacity with cardiopulmonary exercise testing in non-severe COVID-19 patients at three months follow-up. <i>medRxiv</i> . 2020.                     |

|    |         |                                                                                                                                                                                                                                                                                                |
|----|---------|------------------------------------------------------------------------------------------------------------------------------------------------------------------------------------------------------------------------------------------------------------------------------------------------|
| 7  | Article | Daher A, Balfanz P, Cornelissen C, Müller A, Bergs I, Marx N, et al. Follow up of patients with severe coronavirus disease 2019 (COVID-19): Pulmonary and extrapulmonary disease sequelae. <i>Respiratory medicine</i> . 2020;174:106197.                                                      |
| 8  | Article | Darley DR, Dore GJ, Cysique L, et al. Persistent symptoms up to four months after community and hospital-managed SARS-CoV-2 infection. <i>Med J Aust</i> . 2021;214(6):279-280. doi:10.5694/mja2.50963                                                                                         |
| 9  | Article | Du H, Fang S, Wu S, Chen X, Chen J, Zhang Y. Six-month follow-up of functional status in discharged patients with coronavirus disease 2019. 2020.                                                                                                                                              |
| 10 | Article | Gambini G, Savastano MC, Savastano A, De Vico U, Crincoli E, Cozzupoli MG, et al. Ocular surface impairment after COVID-19: a cohort study. <i>Cornea</i> . 2020.                                                                                                                              |
| 11 | Article | Garcia-Abellan J, Padilla S, Fernandez-Gonzalez M. Long-term clinical, virological and immunological outcomes in patients hospitalized for COVID-19: antibody response predicts long COVID. <i>medRxiv</i> . 2021.                                                                             |
| 12 | Article | Garcia-Manzanedo S, Lopez de la Oliva Calvo L, Ruiz Alvarez L. Guillain-Barre syndrome after Covid-19 infection. <i>Med Clin (Engl Ed)</i> . 2020;155(8):366.                                                                                                                                  |
| 13 | Article | Gassel RJJv, Bels JLM, Raafs A. High Prevalence of Pulmonary Sequelae at 3 Months after Hospital Discharge in Mechanically Ventilated Survivors of COVID-19. <i>American Journal of</i> . 2021.                                                                                                |
| 14 | Article | Goel N, Goyal N, Kumar R. Clinico-radiological evaluation of post COVID-19 at a tertiary pulmonary care centre in Delhi, India. <i>Monaldi Archives for Chest Disease</i> . 2021;8:08-                                                                                                         |
| 15 | Article | González J, Benítez ID, Carmona P, Santistevé S, Monge A, Moncusí-Moix A, et al. PULMONARY FUNCTION AND RADIOLOGICAL FEATURES IN SURVIVORS OF CRITICAL COVID-19: A 3-MONTH PROSPECTIVE COHORT. <i>Chest</i> . 2021.                                                                            |
| 16 | Article | Han X, Cao Y, Jiang N, Chen Y, Alwalid O, Zhang X, et al. Novel Coronavirus Disease 2019 (COVID-19) Pneumonia Progression Course in 17 Discharged Patients: Comparison of Clinical and Thin-Section Computed Tomography Features During Recovery. <i>Clin Infect Dis</i> . 2020;71(15):723-31. |
| 17 | Article | Ishaque S, Syed B, Akhter S, Safeer T, Hashmi A. Clinical Outcome of COVID 19 Patients After Hospitalization: Observational Study from a Tertiary Care Hospital, PAKISTAN. 2020.                                                                                                               |
| 18 | Article | Jamil A, Shyam V, Neupane K. Atypical Presentation of Pulmonary Embolism Several Months After COVID-19 Infection. <i>Cureus</i> . 2021;13(1):e12863.                                                                                                                                           |
| 19 | Article | Ladds E, Rushforth A, Wieringa S, Taylor S, Rayner C, Husain L, et al. Persistent symptoms after Covid-19: qualitative study of 114 "long Covid" patients and draft quality principles for services. <i>BMC health services research</i> . 2020;20(1):1144.                                    |
| 20 | Article | Lechien JR, Ciciu MP, Crevier-Buchman L, Hans S. Post-COVID-19 paradoxical vocal fold movement disorder. <i>Eur Arch Otorhinolaryngol</i> . 2020.                                                                                                                                              |
| 21 | Article | Leijte WT, Wagemaker NMM, van Kraaij TDA, de Kruif MD, Mostard GJM, Leers MPG, et al. [Mortality and re-admission after hospitalization with COVID-19]. <i>Nederlands tijdschrift voor geneeskunde</i> . 2020;164.                                                                             |
| 22 | Article | Leth S, Gunst JD, Mathiasen VD. Persistent symptoms in hospitalized patients recovering from COVID-19 in Denmark. <i>Open Forum ....</i> 2021.                                                                                                                                                 |
| 23 | Article | Liang L, Yang B, Jiang N, Fu W, He X, Zhou Y, et al. Three-month Follow-up Study of Survivors of Coronavirus Disease 2019 after Discharge. <i>Journal of Korean medical science</i> . 2020;35(47):e418.                                                                                        |
| 24 | Article | Lin MX, Huang L, Zheng D, Zhang L, Feng B, Liu Y. Health-related quality of life of COVID-19 survivors at 6 months after hospital discharge: a cohort study. 2021.                                                                                                                             |
| 25 | Article | Meijenfeldt FAv, Havervall S, Adelmeijer J. Sustained prothrombotic changes in COVID-19 patients 4 months after hospital discharge. <i>Blood ....</i> 2021.                                                                                                                                    |
| 26 | Article | Menges D, Ballouz T, Anagnostopoulos A. Estimating the burden of post-COVID-19 syndrome in a population-based cohort study of SARS-CoV-2 infected individuals: Implications for healthcare service .... <i>medRxiv</i> . 2021.                                                                 |
| 27 | Article | Monti G, Leggieri C, Fominskiy E, Scandroglio AM, Colombo S, Tozzi M, et al. Two-months quality of life of COVID-19 invasively ventilated survivors; an Italian single-center study. <i>Acta Anaesthesiol Scand</i> . 2021.                                                                    |
| 28 | Article | Munblit D, Bobkova P, Spiridonova E, Shikhaleva A. Risk factors for long-term consequences of COVID-19 in hospitalised adults in Moscow using the ISARIC Global follow-up protocol: StopCOVID cohort study. <i>medRxiv</i> . 2021.                                                             |
| 29 | Article | Pan C, Zhang Z, Luo L, Wu W, Jia T, Lu L, et al. Cardiac T1 and T2 Mapping Showed Myocardial Involvement in Recovered COVID-19 Patients Initially Considered Devoid of Cardiac Damage. <i>J Magn Reson Imaging</i> . 2021.                                                                     |
| 30 | Article | Park HY, Jung J, Park HY, Lee SH, Kim ES, Kim HB, et al. Psychological Consequences of Survivors of COVID-19 Pneumonia 1 Month after Discharge. <i>J Korean Med Sci</i> . 2020;35(47):e409.                                                                                                    |
| 31 | Article | Parry AH, Wani AH, Shah NN, Jehangir M. Medium-term chest computed tomography (CT) follow-up of COVID-19 pneumonia patients after recovery to assess the rate of resolution and determine the potential predictors of persistent lung changes. <i>Egypt J Radiol Nuc M</i> . 2021;52(1).       |

|    |          |                                                                                                                                                                                                                                                                                                                                                                                                |
|----|----------|------------------------------------------------------------------------------------------------------------------------------------------------------------------------------------------------------------------------------------------------------------------------------------------------------------------------------------------------------------------------------------------------|
| 32 | Preprint | Peluso MJ, Deitchman AN, Torres L, Iyer NS, Nixon CC, Munter SE, et al. Long-Term SARS-CoV-2-Specific Immune and Inflammatory Responses Across a Clinically Diverse Cohort of Individuals Recovering from COVID-19. MedRxiv : the preprint server for health sciences. 2021.                                                                                                                   |
| 33 | Preprint | Pilotto A, Cristillo V, Piccinelli SC, Zoppi N, Bonzi G. COVID-19 severity impacts on long-term neurological manifestation after hospitalisation. medRxiv. 2021.                                                                                                                                                                                                                               |
| 34 | Article  | Qin Y, Wu J, Chen T, Li J, Zhang G, Wu D, et al. Long-term micro-structure and cerebral blood flow changes in patients recovered from COVID-19 without neurological manifestations. The Journal of clinical investigation. 2021.                                                                                                                                                               |
| 35 | Article  | Rossi Ferrario S, Panzeri A, Cerutti P, Sacco D. The Psychological Experience and Intervention in Post-Acute COVID-19 Inpatients. Neuropsychiatric disease and treatment. 2021;17:413-22.                                                                                                                                                                                                      |
| 36 | Preprint | Santis LV-D, Perez-Camacho I, Sobrino B. Clinical and immunoserological status 12 weeks after infection with COVID-19: prospective observational study. medRxiv. 2020.                                                                                                                                                                                                                         |
| 37 | Article  | Shah AS, Wong AW, Hague CJ, Murphy DT, Johnston JC, Ryerson CJ, et al. A prospective study of 12-week respiratory outcomes in COVID-19-related hospitalisations. Thorax. 2020.                                                                                                                                                                                                                 |
| 38 | Article  | Singhi AK, Mohapatra SK, Sarkar SD, Biswas D, Pal P. Cardiac Affection in a Young Girl with Post Covid-19 Kawasaki Like Syndrome. Indian J Pediatr. 2021;88(3):303-4.                                                                                                                                                                                                                          |
| 39 | Article  | Smame L, Stars I, Pucuka Z, Roge I, Pavare J. Persistent clinical features in paediatric patients after SARS-CoV-2 virological recovery: A retrospective population-based cohort study from a single centre in Latvia. BMJ Paediatrics Open. 2020;4(1).                                                                                                                                        |
| 40 | Article  | Soares FHC, Kubota GT, Fernandes AM, Hojo B, Couras C, Costa BV, et al. Prevalence and characteristics of new-onset pain in COVID-19 survivors, a controlled study. European journal of pain (London, England). 2021.                                                                                                                                                                          |
| 41 | Article  | Taboada M, Moreno E, Carinena A, Rey T, Pita-Romero R, Leal S, et al. Quality of life, functional status, and persistent symptoms after intensive care of COVID-19 patients. Br J Anaesth. 2020;126(3):e110-e3.                                                                                                                                                                                |
| 42 | Preprint | Townsend L, Dyer AH, Naughton A, Kiersey R. Longitudinal analysis of COVID-19 patients shows age-associated T cell changes independent of ongoing ill-health. medRxiv. 2020.                                                                                                                                                                                                                   |
| 43 | Article  | Truffaut L, Demey L, Bruyneel AV, Roman A, Alard S, De Vos N, et al. Post-discharge critical COVID-19 lung function related to severity of radiologic lung involvement at admission. Respir Res. 2021;22(1):29.                                                                                                                                                                                |
| 44 | Article  | Ugurlu BN, Akdogan O, Yilmaz YA, Yapar D, Aktar Ugurlu G, Yerlikaya HS, et al. Quantitative evaluation and progress of olfactory dysfunction in COVID-19. European archives of oto-rhino-laryngology : official journal of the European Federation of Oto-Rhino-Laryngological Societies (EUFOS) : affiliated with the German Society for Oto-Rhino-Laryngology - Head and Neck Surgery. 2021. |
| 45 | Article  | Van den Borst B, Peters JB, Brink M, Schoon Y, Bleeker-Rovers CP, Schers H, et al. Comprehensive health assessment three months after recovery from acute COVID-19. Clinical infectious diseases : an official publication of the Infectious Diseases Society of America. 2020.                                                                                                                |
| 46 | Article  | Vlachou M, Drebes A, Candilio L, Weeraman D, Mir N, Murch N, et al. Pulmonary thrombosis in Covid-19: before, during and after hospital admission. J thromb thrombolysis. 2021.                                                                                                                                                                                                                |
| 47 | Article  | Walle-Hansen M, Ranhoff A, Mellingsæter M. Health-Related Quality of Life, Functional Decline, and Long-Term Mortality in Older Patients Following Hospitalisation Due to COVID-19. 2021.                                                                                                                                                                                                      |
| 48 | Article  | Wallis TJM, Heiden E, Horno J, Welham B, Burke H. Risk factors for persistent abnormality on chest radiographs at 12-weeks post hospitalisation with PCR confirmed COVID-19. 2021.                                                                                                                                                                                                             |
| 49 | Article  | Whyte MB, Barker R, Kelly PA, Gonzalez E, Czuprynska J, Patel RK, et al. Three-month follow-up of pulmonary embolism in patients with COVID-19. Thromb Res. 2021;201:113-5.                                                                                                                                                                                                                    |
| 50 | Article  | Wong AW, Shah AS, Johnston JC, Carlsten C, Ryerson CJ. Patient-reported outcome measures after COVID-19: a prospective cohort study. Eur Respir J. 2020;56(5).                                                                                                                                                                                                                                 |
| 51 | Article  | Wu Q, Zhong L, Li H, Guo J, Li Y, Hou X, et al. A Follow-Up Study of Lung Function and Chest Computed Tomography at 6 Months after Discharge in Patients with Coronavirus Disease 2019. Can Respir J. 2021;2021:6692409.                                                                                                                                                                       |
| 52 | Article  | Zhang Z, Tang R, Sun H, Dai H, Chen K, Ye X, et al. Temporal lung changes on thin-section CT in patients with COVID-19 pneumonia. Scientific reports. 2020;10(1):19649.                                                                                                                                                                                                                        |

### iii. Clinical trials protocols

| Trial ID | Study title |
|----------|-------------|
|----------|-------------|

|    |                     |                                                                                                                                                                                                                                                                                                              |
|----|---------------------|--------------------------------------------------------------------------------------------------------------------------------------------------------------------------------------------------------------------------------------------------------------------------------------------------------------|
| 1  | NCT04768257         | Physical Activity Post Coronavirus (COVID-19). A Longitudinal Study                                                                                                                                                                                                                                          |
| 2  | DRKS00024434        | Immune-mediated pathogenesis and development of autoimmunity in neurological manifestations of COVID-19 - IPEA                                                                                                                                                                                               |
| 3  | NCT04736732         | The IRCM POST-COVID-19 (IPCO) Clinic: A Multidisciplinary Approach to Evaluate Short and Long-term Complications of COVID-19                                                                                                                                                                                 |
| 4  | ISRCTN15615697      | Endocrinopathies post COVID-19                                                                                                                                                                                                                                                                               |
| 5  | CTRI/2021/01/030816 | Post COVID-19 ENT manifestations-An institutional based prospective study.                                                                                                                                                                                                                                   |
| 6  | NCT04728906         | Targeted-cell Therapy Using Epithelial Stem Cells and Patients' Cardiomyocytes Loaded in Amnion Bilayer to Regenerate Myocardial Infarction Post COVID-19 Complication                                                                                                                                       |
| 7  | CTRI/2021/01/030734 | Assessment of Pulmonary Complications in Post Covid Patients - NA                                                                                                                                                                                                                                            |
| 8  | CTRI/2021/01/030573 | Post Hospital Discharge follow-up of Health-Related Quality of Life (HRQOL) of COVID-19 infected patients. (COVID QOL India) - MIER/COVID/QOL/India/001                                                                                                                                                      |
| 9  | NCT04716465         | Dysautonomia in Patients Post COVID-19 Infection (DYSCO)                                                                                                                                                                                                                                                     |
| 10 | NCT04718506         | Rehabilitation for Post-COVID-19 Syndrome Through a Multicomponent, Educational and Supervised Exercise Intervention [RECOVE]                                                                                                                                                                                |
| 11 | NCT04701892         | Central Sensitisation in Post Covid-19 Infection Patients: a Prospective Cohort Study (SILENT 2)                                                                                                                                                                                                             |
| 12 | NCT04703452         | Central Sensitisation in Post Covid-19 Infection Patients: a Cross-sectional Study (SILENT 1)                                                                                                                                                                                                                |
| 13 | NCT04705831         | A Randomized, Double Blind, Placebo Controlled, Cross-Over, Proof-of-Concept Study to Evaluate the Benefit of RUCONEST (C1 Esterase Inhibitor [Recombinant]) in Improving Neurological Symptoms in Post-SARS-CoV-2 Infection                                                                                 |
| 14 | CTRI/2021/01/030235 | Lung Function Indices Measured by Forced Oscillation Test in Post Covid patients: An Observational Study.                                                                                                                                                                                                    |
| 15 | CTRI/2020/12/029985 | An Open-labeled study to investigate efficacy of add-on personalized Ayurveda intervention in Covid-19 Patients with moderate diseases severity with type 2 diabetes followed by 60 day follow-up of post-viral syndrome post Covid-19 in comparison to standalone treatment based on ICMR guidelines - AAIC |
| 16 | NCT04678700         | Implementation of a Respiratory Physiotherapy Program in Post COVID-19 Patients Through Tele-assistance                                                                                                                                                                                                      |
| 17 | CTRI/2020/12/029755 | Assessment and characterisation of symptoms and quality of life in post covid patients                                                                                                                                                                                                                       |
| 18 | CTRI/2020/12/029733 | To Assess CT Chest finding of Post-covid Pneumonia Patient                                                                                                                                                                                                                                                   |
| 19 | NCT04657484         | Comparison of the Efficacy and Safety of Two Corticosteroid Regimens in the Treatment of Diffuse Lung Disease After Coronavirus Disease 2019 (COVID-19) Pneumonia                                                                                                                                            |
| 20 | NCT04649957         | Profiling the Determinants of Recovery to Establish Novel Rehabilitation Guidelines to Improve Clinically Relevant and Patient-reported Outcomes in the Post-COVID-19 Period                                                                                                                                 |
| 21 | NCT04647656         | Hyperbaric Oxygen Therapy for Post-COVID-19 Syndrome: a Prospective, Randomized, Double Blind Study.                                                                                                                                                                                                         |
| 22 | CTRI/2020/11/029437 | A retrospective study to evaluate clinical and radiological course in COVID 19 interstitial pneumonia.                                                                                                                                                                                                       |
| 23 | CTRI/2020/11/029305 | Clarithromycin in post Covid parenchymal organizing pneumonia - an open labelled randomized control trial - PCOVID                                                                                                                                                                                           |
| 24 | NCT04634318         | Organization of Pulmonary Rehabilitation of Post-COVID-19 Patient With Sequelae. Assessment and Therapeutic Indication of Tele-rehabilitation Versus Conventional Rehabilitation                                                                                                                             |
| 25 | CTRI/2020/11/029188 | Assessment of quality of life in patients who have recovered from SARS -COV 2 infection                                                                                                                                                                                                                      |
| 26 | CTRI/2020/11/029025 | AN OPEN LABEL SINGLE CENTRE PROSPECTIVE OBSERVATIONAL STUDY TO EVALUATE THE RADIOLOGICAL PATTERNS:POST COVID 19 COMPLICATIONS AND CLINICAL OUTCOME RESOLUTIONS OF LUNGS AND BRAIN IN COVID 19 CONFIRMED PATIENTS TREATED WITH AN ANTIVIRAL DRUG ZingiVir-H.                                                  |
| 27 | DRKS00023334        | SARS-CoViD-Endothelitis Study via Retinal Vascular Analysis (COVID-19) - VoViThel                                                                                                                                                                                                                            |
| 28 | ACTRN12620001114932 | Morbidity Post COVID-19 - Investigation and call to action                                                                                                                                                                                                                                                   |



|    |                     |                                                                                                                                                                                                                                                                   |
|----|---------------------|-------------------------------------------------------------------------------------------------------------------------------------------------------------------------------------------------------------------------------------------------------------------|
| 29 | NCT04607928         | Phase-II Randomized Clinical Trial to Evaluate the Effect of Pirfenidone Compared to Placebo in Post-COVID19 Pulmonary Fibrosis                                                                                                                                   |
| 30 | NCT04604704         | Pilot Study Into Low Dose Naltrexone (LDN) and Nicotinamide Adenine Dinucleotide (NAD+) for Treatment of Patients With Post-COVID-19 Syndrome (Long-COVID19)                                                                                                      |
| 31 | NCT04604080         | Post-COVID-19 Epidemic Depression Assessment in Adults in South Punjab Pakistan                                                                                                                                                                                   |
| 32 | NCT04592354         | Anhydrous Enol-Oxaloacetate (AEO) on Improving Fatigue in Post-COVID-19 Survivors                                                                                                                                                                                 |
| 33 | NCT04595240         | Semen Analysis Changes in Covid-19 Positive Patients                                                                                                                                                                                                              |
| 34 | NCT04584450         | Investigation of Validity and Reliability of Post-COVID-19 Functional Status Scale                                                                                                                                                                                |
| 35 | NL8947              | ReCOVer: A Randomised Controlled Trial testing the efficacy of Cognitive Behavioural Therapy for preventing chronic post-infectious fatigue among patients diagnosed with COVID-19.                                                                               |
| 36 | CTRI/2020/10/028179 | Impact of Post COVID Physiotherapy and Rehabilitation in Bangladesh                                                                                                                                                                                               |
| 37 | NCT04574050         | A Self - Guided, Internet - Based Intervention for Patients With Chronic Breathlessness (SELF-BREATHE): Feasibility Randomised Controlled Trial                                                                                                                   |
| 38 | NCT04561141         | Post Covid Syndrome: Clinical Pattern and Functional Assessment                                                                                                                                                                                                   |
| 39 | NCT04551781         | Short Term Low Dose Corticosteroids for Management of Post Covid-19 Pulmonary Fibrosis                                                                                                                                                                            |
| 40 | NCT04544605         | Special Chinese Medicine Out-patient Programme for Discharged COVID-19 Patients: An Observational Study                                                                                                                                                           |
| 41 | NCT04534478         | Randomized, Open, Parallel, Single-center, Non-inferiority Clinical Trial, With an Active Control Group, Comparing Two Oral Prednisone Regimens With the Aim of Optimizing the Therapeutic Strategy in Patients With Organizing Pneumonia Post-COVID-19 Infection |
| 42 | NCT04601415         | Diagnosis of Heart Failure in the Post-COVID-19 Clinic, Primary Care and Hospital Setting Using a Digital Stethoscope With Artificial Intelligence (AI) Electrocardiogram (ECG)                                                                                   |
| 43 | NCT04525911         | Assessment of Long-term Impact Post COVID-19 for Patients and Health Care Professionals of the European Hospital                                                                                                                                                  |
| 44 | NCT04514705         | Clinical Respiratory Investigation in Post Covid-19 Patients                                                                                                                                                                                                      |
| 45 | ACTRN12620000778987 | Persistent lung and arterial inflammation following COVID-19 pneumonia                                                                                                                                                                                            |
| 46 | CTRI/2020/07/026821 | Study of dermatological changes post COVID-19 illness within 3 months of recovery.                                                                                                                                                                                |
| 47 | NCT04487691         | Autologous Nebulized Platelet Lysate for Post COVID-19 Syndrome                                                                                                                                                                                                   |
| 48 | NCT04479293         | Assessment of Functional Recovery From COVID-19 Using the Proposed Post- COVID-19 Functional Status Score                                                                                                                                                         |
| 49 | RBR-4wnx2q          | Evaluation, pulmonary rehabilitation and follow-up of individuals affected by Covid-19 after hospital high - treatment and clinical follow-up                                                                                                                     |
| 50 | NCT04414904         | Determining the Reproductive Health of Men Post-COVID-19 Infection                                                                                                                                                                                                |
| 51 | NCT04388436         | Cardiopulmonary and Immunological Impacts of Covid-19 in a Cohort of Survivors                                                                                                                                                                                    |
| 52 | NCT04374474         | Olfactory Retraining Therapy and Budesonide Nasal Rinse for Anosmia Treatment in Patients Post-CoVID 19. A Randomized Controlled Trial                                                                                                                            |
| 53 | DRKS00024434        | Immune-mediated pathogenesis and development of autoimmunity in neurological manifestations of COVID-19                                                                                                                                                           |
| 54 | ACTRN12621000031864 | Home-based virtual rehabilitation for people with persistent symptoms after COVID-19 disease (Long COVID-19)                                                                                                                                                      |
| 55 | NCT04695704         | Montelukast Clinical Trial in Mild-moderate Respiratory Symptoms in Patients With Long-COVID (ESPERANZA COVID)                                                                                                                                                    |
| 56 | NCT04659889         | Clinical and Haematological Phenotypes in Long COVID                                                                                                                                                                                                              |
| 57 | NCT04876417         | tDCS for Post COVID-19 Fatigue                                                                                                                                                                                                                                    |

|    |             |                                                                                                                                         |
|----|-------------|-----------------------------------------------------------------------------------------------------------------------------------------|
| 58 | NCT04798066 | Intermediate Size Expanded Access Protocol Evaluating HB-adMSC's for the Treatment of Post-COVID-19 Syndrome (LongHaulers)              |
| 59 | NCT04694768 | Implementation of Rehabilitation Program for Post COVID-19                                                                              |
| 60 | NCT04718506 | Rehabilitation for Post-COVID-19 Syndrome Through a Supervised Exercise Intervention (RECOVE)                                           |
| 61 | NCT04881305 | Characterizing Long-term Cognitive and Emotional Impairment in Post-COVID-19 Sequelae                                                   |
| 62 | NCT04849598 | Automatic Oxygen Titration in Patients After SARS-CoV-2 Infection                                                                       |
| 63 | NCT04885504 | Post COVID-19 Biorepository                                                                                                             |
| 64 | NCT04836351 | Rehabilitation for Patients With Persistent Symptoms Post COVID-19                                                                      |
| 65 | NCT04811859 | The Effect of Inspiratory Muscle Training in Post COVID-19 Patients                                                                     |
| 66 | NCT04813718 | Post COVID-19 Syndrome and the Gut-lung Axis                                                                                            |
| 67 | NCT04716465 | Dysautonomia in Patients Post COVID-19 Infection (DYSCO)                                                                                |
| 68 | NCT04794985 | Post-COVID-Health Study: Multidimensional Health Status of COVID-19 Survivors One Year After a SARS-CoV-2 Infection                     |
| 69 | NCT04818489 | Colchicine and Post-COVID-19 Pulmonary Fibrosis                                                                                         |
| 70 | NCT04860869 | Endocrine, Metabolic and Microbiome Influence on the Post COVID-19 Syndrome                                                             |
| 71 | NCT04794036 | Efficacy of an Asynchronous Telerehabilitation Programme in Post-COVID-19 Patient                                                       |
| 72 | NCT04841759 | The Effects of a Multi-factorial Rehabilitation Program for Healthcare Workers Suffering From Post-COVID-19 Fatigue Syndrome            |
| 73 | NCT04806880 | Study Evaluating the Olfactory Recovery of Anosmia Post COVID-19 by Olfactory Rehabilitation Assisted by Web-application (COVIDANOSMIA) |
| 74 | NCT04796064 | Low Versus High-Intensity Aerobic Training in Community-dwelling Older Men With Post-COVID 19 (SARS-CoV-2) Sarcopenia                   |
| 75 | NCT04705831 | Study to Evaluate the Benefit of RUCONEST in Improving Neurological Symptoms in Post COVID-19 Infection                                 |
| 76 | NCT04799444 | LATE-COVID/LATE-COVID-Kids - Observational Study in Children and Adults (LATE-COVID)                                                    |
| 77 | NCT04860206 | Post COVID19 Functional and Cognitive Assessments (PostCovidZRS)                                                                        |
| 78 | NCT04889313 | Post-COVID Neurologic Symptoms : a Somatic Spectrum Disorder ? (SOMATiC)                                                                |
| 79 | NCT04789395 | Evaluation of Post-covid 19 Patients Who Receive Ozonotherapy With Thorax CT                                                            |
| 80 | NCT04859894 | Physiological Studies in Post-COVID-19 Syndrome, and the Association With DNA Methylation                                               |
| 81 | NCT04799977 | COVID-19: Post-covid Olfactory Disorders Assessment                                                                                     |
| 82 | NCT04830943 | Cerebrolycin for Treatment of Covid-related Anosmia and Ageusia                                                                         |
| 83 | NCT04793269 | Characteristics of Long COVID-19 Syndrome                                                                                               |
| 84 | NCT04586413 | Post Acute COVID-19 Quality of Life (PAC-19QoL) Tool Development and Patient Registry (PAC-19QoLReg)                                    |
| 85 | NCT04573062 | Natural History of Post-Coronavirus Disease 19 Convalescence at the National Institutes of Health                                       |
| 86 | NCT04794374 | Effects of Telerehabilitation After Discharge in COVID-19 Survivors                                                                     |
| 87 | NCT04886414 | Home-based Care and Hand Hygiene Interventions in Honduras                                                                              |
| 88 | NCT04810065 | SingStrong: Strong Lungs Through Song - Long COVID-19 Study                                                                             |

|     |             |                                                                                                                                                       |
|-----|-------------|-------------------------------------------------------------------------------------------------------------------------------------------------------|
| 89  | NCT04871815 | Effects of Sodium Pyruvate Nasal Spray in COVID-19 Long Haulers.                                                                                      |
| 90  | NCT04795557 | Efficacy of Adaptogens in Patients With Long COVID-19                                                                                                 |
| 91  | NCT04809974 | Clinical Trial of Niagen to Examine Recovery in People With Persistent Cognitive and Physical Symptoms After COVID-19 Illness (Long-COVID)            |
| 92  | NCT04842448 | Safety and Efficacy of Hyperbaric Oxygen Therapy for Long COVID Syndrome                                                                              |
| 93  | NCT04786353 | Long COVID Kids DK - Investigating Long-term Covid-19                                                                                                 |
| 94  | NCT04806620 | Comparison of ME/CFS and Long COVID-19 Patients                                                                                                       |
| 95  | NCT04883190 | Fatigue a Long COVID-19 Symptom Substudy of FSC19-KN Trial                                                                                            |
| 96  | NCT04880161 | A Study to Evaluate Ampion in Patients With Prolonged Respiratory Symptoms Due to COVID-19 (Long COVID)                                               |
| 97  | NCT04851561 | Post-coronavirus Disease-2019 Fatigue                                                                                                                 |
| 98  | NCT04872309 | MUlti-nuclear MR Imaging Investigation of Respiratory Disease-associated CHanges in Lung Physiology                                                   |
| 99  | NCT04652518 | LYT-100 in Post-acute COVID-19 Respiratory Disease                                                                                                    |
| 100 | NCT04854772 | Mind Body Intervention for COVID-19 Long Haul Syndrome                                                                                                |
| 101 | NCT04508712 | Long-term Outcomes in Patients With COVID-19                                                                                                          |
| 102 | NCT04715919 | Long Term Outcomes of Coronavirus Disease-19 (COVID-19)                                                                                               |
| 103 | NCT04362150 | Long-term Impact of Infection With Novel Coronavirus (COVID-19)                                                                                       |
| 104 | NCT04686734 | Long-term Effects of COVID-19 in Adolescents                                                                                                          |
| 105 | NCT04599998 | Long-term Follow-up Findings of Inpatients for COVID-19 Pneumonia                                                                                     |
| 106 | NCT04685629 | Covid-19 Long-term Revalidation Follow-up (Colonel)                                                                                                   |
| 107 | NCT04581135 | Study to Investigate Long-term Pulmonary and Extrapulmonary Effects of COVID-19                                                                       |
| 108 | NCT04828135 | Dual MRI for Cardiopulmonary COVID-19 Long Haulers                                                                                                    |
| 109 | NCT04871789 | Optimization of Patients Long-term Management After the Coronavirus Infection COVID-19 (OPTIMIST)                                                     |
| 110 | NCT04644341 | Tele-monitoring of COVID-19 Survivors for Long-Term Impacts                                                                                           |
| 111 | NCT04814914 | An Observational Clinical Study to Evaluate COVID-19 Symptoms in "Long Hauler" Patients Who Participated in K031-120 or K032-120                      |
| 112 | NCT04376840 | Prevalence of Long-term Respiratory Complications of Severe SARS-CoV-2 Pneumonia - COVID-19                                                           |
| 113 | NCT04382755 | Zilucoplan® in Improving Oxygenation and Short- and Long-term Outcome of COVID-19 Patients With Acute Hypoxic Respiratory Failure (ZILU-COV)          |
| 114 | NCT04605757 | Long-term Evolution of Pulmonary Involvement of Novel SARS-COV-2 Infection (COVID-19): Follow the Covid Study                                         |
| 115 | NCT04893070 | Impact of SARS-CoV-2 (COVID-19) Infection, Treated in Ambulatory Care, on Long-term Quality of Life in a Parisian Military Population (COVIDAMBUCMA1) |
| 116 | NCT04401163 | Long-term Pulmonary Outcomes After Infection With Sars-CoV-2                                                                                          |
| 117 | NCT04360538 | Long Term Outcomes of Patients With COVID-19 (COVID19 LTFU)                                                                                           |
| 118 | NCT04830852 | Pediatric SARS-CoV-2 and MIS-C Long-term Follow-up                                                                                                    |
| 119 | NCT04376658 | Quality of Life and Long-term Outcomes After Hospitalization for COVID-19                                                                             |

|     |             |                                                                                                                                                                    |
|-----|-------------|--------------------------------------------------------------------------------------------------------------------------------------------------------------------|
| 120 | NCT04359927 | Long-term Effects of Coronavirus Disease 2019 on the Cardiovascular System: CV COVID-19 Registry (CV-COVID-19)                                                     |
| 121 | NCT04385901 | Long Term Functional Outcomes of COVID-19 Patients Treated by Rehabilitation Services via Telehealth                                                               |
| 122 | NCT04519320 | Medium and Long Term Follow-up of COVID-19 Infected Patients: Research and Characterization of Pulmonary Sequelae (COV-RECUP)                                      |
| 123 | NCT04756193 | Evaluate Long Term Cardiovascular and Pulmonary Complications After COVID-19 With Point of Care Ultrasound                                                         |
| 124 | NCT04813575 | COVID-19 Pathophysiology of Long Term Implications                                                                                                                 |
| 125 | NCT04893668 | Depression and Anxiety in Long Term Coronavirus Disease (COVID) 19 (DALT-COV)                                                                                      |
| 126 | NCT04477902 | Long-Term Experience and Health Effects of COVID-19                                                                                                                |
| 127 | NCT04356378 | Long Term Physical Functional Limitations in Daily Living in SARS-CoV2 Infected Patients Hospitalized in the Acute Phase Then Requiring Rehabilitation (CAPACoV19) |
| 128 | NCT04605965 | WEAICOR: Wearables to Investigate the Long Term Cardiovascular and Behavioral Impacts of COVID-19 (WEAICOR)                                                        |
| 129 | NCT04881266 | Long-Term Functional, Quality-of-Life, Neuropsychological and Cognitive Outcomes in COVID-19 Critical Illness Survivors (LUNGTERMcov)                              |
| 130 | NCT04678830 | COVID-19 Long-Haulers Study                                                                                                                                        |
| 131 | NCT04559100 | Long-term Characterization of Patients With Severe/Critical Infection by COVID-19 Virus                                                                            |
| 132 | NCT04673279 | Long-term COVID-19 Immune Response in a Vulnerable Neighbourhood in Argentina                                                                                      |
| 133 | NCT04444661 | Effects of COVID-19 Induced Deconditioning After Long-term High Intensity Resistance Exercise                                                                      |
| 134 | NCT04347850 | A Cohort of Patients With Possible or Confirmed SARS-CoV-2 (COVID-19) (COVIDothèque)                                                                               |
| 135 | NCT04410107 | Lung Function, Exercise Capacity and Health-Related Quality of Life After Severe COVID-19                                                                          |
| 136 | NCT04836767 | Evaluation of Physical and Functional Status in Patients With COVID-19 in Long Term                                                                                |
| 137 | NCT04326920 | Sargramostim in Patients With Acute Hypoxic Respiratory Failure Due to COVID-19 (SARPAC)                                                                           |
| 138 | NCT04330638 | Treatment of COVID-19 Patients With Anti-interleukin Drugs (COV-AID)                                                                                               |
| 139 | NCT04401449 | Cardiopulmonary Inflammation and Multi-System Imaging During the Clinical Course of COVID-19 Infection in Asymptomatic and Symptomatic Persons                     |
| 140 | NCT04384029 | The Geneva Covid-19 CVD Study                                                                                                                                      |
| 141 | NCT04397172 | Intensive Care Associated Complications and Outcome of Acute Respiratory Distress Syndrome Due to COVID-19                                                         |
| 142 | NCT04368845 | Telerehabilitation in Patients With COVID-19 After Hospitalization. The ATHLOS Study (ATHLOS)                                                                      |
| 143 | NCT04416464 | Quality of Life and Patient-centered Outcomes After ICU Admission for COVID-19                                                                                     |
| 144 | NCT04661462 | Health After Covid-19 in Tyrol                                                                                                                                     |
| 145 | NCT04593069 | The COGCOV Study in ICU Patients                                                                                                                                   |

**Table S4. The long list of outcomes used in post-COVID-19 condition studies.**

| Outcome area                   | Outcome domain (per COMET taxonomy)            | Outcome                                          |
|--------------------------------|------------------------------------------------|--------------------------------------------------|
| <b>Death</b>                   | 1. Mortality/survival (n = 1)                  | All-cause mortality                              |
| <b>Physiological/ clinical</b> | 2. Blood and lymphatic system outcomes (n = 9) | Sustained prothrombotic changes                  |
|                                |                                                | Anaemia                                          |
|                                |                                                | Thrombocytopenia                                 |
|                                |                                                | Neutrophil to lymphocyte ratio changes           |
|                                |                                                | Changes in inflammatory markers                  |
|                                |                                                | Changes in serum creatine kinase (CK)            |
|                                |                                                | Changes in lactate dehydrogenase (LDH)           |
|                                |                                                | Changes in glutamic-pyruvic transaminase (GPT)   |
|                                |                                                | Electrolytes changes                             |
|                                | 3. Cardiac outcomes (n = 12)                   | Angina pectoris                                  |
|                                |                                                | Acute coronary disease                           |
|                                |                                                | Heart rhythm issues                              |
|                                |                                                | Heart failure                                    |
|                                |                                                | Palpitations                                     |
|                                |                                                | Chest tightness                                  |
|                                |                                                | Newly diagnosed hypertension                     |
|                                |                                                | Myocardial fibrosis                              |
|                                |                                                | Myo- or pericarditis                             |
|                                |                                                | Changes in cardiovascular fitness                |
|                                |                                                | Signal variations in the Electrocardiogram (ECG) |
|                                | 4. Endocrine outcomes (n = 7)                  | High blood pressure                              |
|                                |                                                | Diabetes mellitus                                |
|                                |                                                | Worsening control of existing diabetes (T1/T2)   |
|                                |                                                | Diabetic ketoacidosis                            |

|  |                                       |                                                                              |
|--|---------------------------------------|------------------------------------------------------------------------------|
|  |                                       | Hyperlipidaemia                                                              |
|  |                                       | Subacute thyroiditis                                                         |
|  |                                       | Hyperthyroidism                                                              |
|  |                                       | Hypothalamic–pituitary–adrenal axis suppression                              |
|  | 5. Ear and labyrinth outcomes (n = 2) | Tinnitus                                                                     |
|  |                                       | Hearing problems                                                             |
|  | 6. Eye outcomes (n = 5)               | Visual disturbance                                                           |
|  |                                       | Red eyes/eye irritation                                                      |
|  |                                       | Conjunctivitis                                                               |
|  |                                       | Dry eye disease                                                              |
|  |                                       | Sicca syndrome                                                               |
|  | 7. Gastrointestinal outcomes (n = 10) | Nausea or vomiting                                                           |
|  |                                       | Diarrhoea                                                                    |
|  |                                       | Gastritis                                                                    |
|  |                                       | Dyspepsia                                                                    |
|  |                                       | GORD                                                                         |
|  |                                       | Dysphagia                                                                    |
|  |                                       | Bloody stool                                                                 |
|  |                                       | Enrichment of opportunistic organisms and depletion of beneficial commensals |
|  |                                       | Post-infectious irritable bowel syndrome                                     |
|  |                                       | Constipation                                                                 |
|  | 8. General outcomes (n = 20)          | Fatigue                                                                      |
|  |                                       | Fever                                                                        |
|  |                                       | Malaise                                                                      |
|  |                                       | Weakness                                                                     |
|  |                                       | New daytime sweating                                                         |
|  |                                       | New nighttime sweating                                                       |
|  |                                       | Flushing                                                                     |

|  |                                                            |                                                                                                               |
|--|------------------------------------------------------------|---------------------------------------------------------------------------------------------------------------|
|  |                                                            | Loss of appetite                                                                                              |
|  |                                                            | Hair loss                                                                                                     |
|  |                                                            | Unspecified pain                                                                                              |
|  |                                                            | Sleep disorder                                                                                                |
|  |                                                            | Chest pain                                                                                                    |
|  |                                                            | Breathlessness                                                                                                |
|  |                                                            | Sleep apnea                                                                                                   |
|  |                                                            | Voice change                                                                                                  |
|  |                                                            | Abdominal pain                                                                                                |
|  |                                                            | Faints                                                                                                        |
|  |                                                            | Limb edema                                                                                                    |
|  |                                                            | Dry mouth                                                                                                     |
|  |                                                            | Dental issues                                                                                                 |
|  | 9. Hepatobiliary outcomes (n = 2)                          | Chronic liver disease                                                                                         |
|  |                                                            | Liver function test changes                                                                                   |
|  | 10. Immune system outcomes (n = 2)                         | Hyperinflammatory state induced SARS-CoV-2                                                                    |
|  |                                                            | Post-MIS-C: coronary artery aneurysm, neurologic (headache, encephalopathy, stroke and seizure) complications |
|  | 11. Infection and infestation outcomes (n = 2)             | Prolonged viral fecal shedding                                                                                |
|  |                                                            | Tuberculosis                                                                                                  |
|  | 12. Metabolism and nutrition outcomes (n = 4)              | Unintentional weight loss                                                                                     |
|  |                                                            | Unintentional weight gain                                                                                     |
|  |                                                            | New onset bone demineralisation                                                                               |
|  |                                                            | Unintentional change in Body Constitution                                                                     |
|  | 13. Musculoskeletal and connective tissue outcomes (n = 6) | Myalgia                                                                                                       |
|  |                                                            | Arthralgia                                                                                                    |
|  |                                                            | Limb pain - upper or lower                                                                                    |
|  |                                                            | Muscle atrophy                                                                                                |
|  |                                                            | Changes in neuromuscular performance during resistance exercise                                               |

|  |                                                                                                            |                                           |
|--|------------------------------------------------------------------------------------------------------------|-------------------------------------------|
|  |                                                                                                            | Dorsal/low back pain                      |
|  | 14. Outcomes relating to neoplasms: benign, malignant and unspecified (including cysts and polyps) (n = 1) | Worsening of pre-existing cancer/neoplasm |
|  | 15. Nervous system outcomes (n = 23)                                                                       | Dizziness                                 |
|  |                                                                                                            | Headache                                  |
|  |                                                                                                            | Stroke                                    |
|  |                                                                                                            | Autonomic dysfunction                     |
|  |                                                                                                            | Tremors                                   |
|  |                                                                                                            | Seizures                                  |
|  |                                                                                                            | Taste disturbance                         |
|  |                                                                                                            | Smell disturbance                         |
|  |                                                                                                            | Bradykinesia                              |
|  |                                                                                                            | Dysmetria                                 |
|  |                                                                                                            | Speech difficulty / dysarthria            |
|  |                                                                                                            | Numbness                                  |
|  |                                                                                                            | Guillain-Barré syndrome                   |
|  |                                                                                                            | Abnormal reflex status                    |
|  |                                                                                                            | Trigeminal neuralgia                      |
|  |                                                                                                            | Neuralgia/neuropathy                      |
|  |                                                                                                            | Frontal release signs                     |
|  |                                                                                                            | Parkinsonism                              |
|  |                                                                                                            | Problems with balance                     |
|  |                                                                                                            | Encephalitis                              |
|  | Brain physiology changes                                                                                   |                                           |
|  | Restless legs                                                                                              |                                           |
|  | Abnormal muscle tone                                                                                       |                                           |
|  | 16. Renal and urinary outcomes (n = 8)                                                                     | New onset bladder incontinence            |
|  |                                                                                                            | Acute kidney injury                       |



|  |                                                             |                                         |
|--|-------------------------------------------------------------|-----------------------------------------|
|  |                                                             | Chronic kidney disease                  |
|  |                                                             | Urinary tract infections                |
|  |                                                             | Problems passing urine                  |
|  |                                                             | Microhaematuria                         |
|  |                                                             | Renal function tests change             |
|  |                                                             | COVID-19-associated nephropathy (COVAN) |
|  | 17. Reproductive system and breast outcomes (n = 4)         | Dysmenorrhea                            |
|  |                                                             | Erectile dysfunction                    |
|  |                                                             | Semen/Sperm changes                     |
|  |                                                             | Infertility                             |
|  | 18. Psychiatric outcomes (n = 14)                           | Depression                              |
|  |                                                             | Anxiety                                 |
|  |                                                             | Post-traumatic stress disorder (PTSD)   |
|  |                                                             | Acute stress disorder                   |
|  |                                                             | Mood change                             |
|  |                                                             | OCD                                     |
|  |                                                             | Behaviour change                        |
|  |                                                             | Thoughts of self-harm/suicide           |
|  |                                                             | Risk to self and/or others              |
|  |                                                             | Psychosis                               |
|  |                                                             | Traumatic bereavement                   |
|  |                                                             | Substance abuse                         |
|  |                                                             | Smoking habit                           |
|  |                                                             | Hallucinations                          |
|  | 19. Respiratory, thoracic and mediastinal outcomes (n = 18) | Sore throat                             |
|  |                                                             | Sneezing                                |
|  |                                                             | New onset COPD                          |
|  |                                                             | Excessive sputum expectoration          |

|                    |                                                                                               |                                         |
|--------------------|-----------------------------------------------------------------------------------------------|-----------------------------------------|
|                    |                                                                                               | Nasal congestion                        |
|                    |                                                                                               | Catarrh                                 |
|                    |                                                                                               | Wheezing                                |
|                    |                                                                                               | Cough                                   |
|                    |                                                                                               | Lung fibrosis                           |
|                    |                                                                                               | Pleurisy                                |
|                    |                                                                                               | Pleural effusion                        |
|                    |                                                                                               | Pain on breathing                       |
|                    |                                                                                               | Pulmonary function abnormalities        |
|                    |                                                                                               | Hypoxaemia                              |
|                    |                                                                                               | Respiratory failure                     |
|                    |                                                                                               | Respiratory disease                     |
|                    |                                                                                               | Bronchiectasis                          |
|                    |                                                                                               | Asthma                                  |
|                    | 20. Skin and subcutaneous tissue outcomes (n = 2)                                             | Ulcers                                  |
|                    |                                                                                               | Skin rash                               |
|                    | 21. Vascular outcomes (n = 3)                                                                 | Thromboembolism                         |
|                    |                                                                                               | Venous thrombosis                       |
|                    |                                                                                               | Pulmonary and systemic vascular disease |
|                    | 22. Congenital, familial and genetic outcomes (n = 0)                                         |                                         |
|                    | 23. Pregnancy, puerperium and perinatal outcomes, including breastfeeding and weaning (n = 0) |                                         |
| <b>Life impact</b> | 24. Physical functioning (n = 4)                                                              | Post-exertional malaise                 |
|                    |                                                                                               | Impaired mobility                       |
|                    |                                                                                               | Walking / gait abnormality              |
|                    |                                                                                               | Problems with usual activities          |

|                     |                                             |                                                                                                      |
|---------------------|---------------------------------------------|------------------------------------------------------------------------------------------------------|
|                     | 25. Social functioning (n = 1)              | COVID related relationship issues                                                                    |
|                     | 26. Role functioning (n = 2)                | Functioning                                                                                          |
|                     |                                             | Work/occupational function changes                                                                   |
|                     | 27. Emotional functioning/wellbeing (n = 9) | Demoralization symptoms                                                                              |
|                     |                                             | Coping issues                                                                                        |
|                     |                                             | Low mood                                                                                             |
|                     |                                             | Burnout                                                                                              |
|                     |                                             | Perceived stigma/ discrimination                                                                     |
|                     |                                             | Worry about infecting others                                                                         |
|                     |                                             | Worry about invasion of privacy                                                                      |
|                     |                                             | Need for accurate information from the government                                                    |
|                     |                                             | Fear of no full recovery                                                                             |
|                     | 28. Cognitive functioning (n = 3)           | Confusion                                                                                            |
|                     |                                             | Concentration impairment                                                                             |
|                     |                                             | Memory impairment                                                                                    |
|                     | 29. Global quality of life (n = 2)          | Reduced quality of life                                                                              |
|                     |                                             | Reduction in health-related quality of life scores                                                   |
|                     | 30. Perceived health status (n = 1)         | Illness perceptions                                                                                  |
|                     | 31. Delivery of care (n = 5)                | Lack of information/ uncertain prognosis                                                             |
|                     |                                             | Difficulty accessing and navigating services                                                         |
|                     |                                             | Difficulty being taken seriously/achieving a diagnosis                                               |
|                     |                                             | Variation in standards (e.g. inconsistent criteria for seeing, investigating and referring patients) |
|                     |                                             | Variable quality of the therapeutic relationship                                                     |
|                     | 32. Personal circumstances (n = 3)          | Self-care ability                                                                                    |
|                     |                                             | COVID related life issues such as debt, unemployment, family relationships                           |
|                     |                                             | Personal finances difficulties                                                                       |
| <b>Resource use</b> | 33. Economic (n = 1)                        | Health economic                                                                                      |

|                       |                                           |                                                    |
|-----------------------|-------------------------------------------|----------------------------------------------------|
|                       |                                           |                                                    |
|                       | 34. Hospital (n = 1)                      | Post-Intensive Care Syndrome                       |
|                       | 35. Need for further intervention (n = 7) | Hospital readmission                               |
|                       |                                           | Further healthcare contact                         |
|                       |                                           | Lung transplantation                               |
|                       |                                           | Oxygen dependence                                  |
|                       |                                           | RRT requirement                                    |
|                       |                                           | Need for regular medical check-ups after discharge |
|                       |                                           | Need for psychiatric service                       |
|                       | 36. Societal/carer burden (n = 2)         | Care dependency                                    |
|                       |                                           | Carer burden                                       |
| <b>Adverse events</b> | 37. Adverse events/effects (n =2)         | Vaccination adverse effects                        |
|                       |                                           | Adverse effects of prednisolone                    |

**Table S5. The list of outcomes presented to the Delphi participants.**

|           |                        | <b>OUTCOMES</b>                                                   | <b>LAY DEFINITIONS</b>                                                                                                                                                                                                                    |
|-----------|------------------------|-------------------------------------------------------------------|-------------------------------------------------------------------------------------------------------------------------------------------------------------------------------------------------------------------------------------------|
| <b>1</b>  | Mortality/survival     | Survival                                                          | How long does someone live                                                                                                                                                                                                                |
| <b>2</b>  | Physiological/clinical | Cardiovascular functioning, symptoms, and conditions              | New onset or worsening of problems affecting the heart (e.g. pounding or racing heart) and the blood vessels (e.g., veins or arteries)                                                                                                    |
| <b>3</b>  | Physiological/clinical | Endocrine and metabolic functioning, symptoms, and conditions     | New onset or worsening of problems related to the glands that make hormones, hormonal balance (e.g., diabetes, thyroid problems, adrenal gland or steroid problems, changes in body weight, bone mineral problems)                        |
| <b>4</b>  | Physiological/clinical | Hearing-related functioning, symptoms, and conditions             | New onset or worsening of problems with hearing (e.g., hearing loss, ringing or buzzing in the ears, increased sensitivity to sounds)                                                                                                     |
| <b>5</b>  | Physiological/clinical | Gastrointestinal functioning, symptoms, and conditions            | New onset or worsening of problems with stomach aches, nausea (feeling sick)/vomiting, diarrhea, malabsorption, constipation, gas, or indigestion (heartburn)                                                                             |
| <b>6</b>  | Physiological/clinical | Fatigue or Exhaustion                                             | New onset or worsening in severity or duration of feeling exhausted, having too little energy, or needing more rest                                                                                                                       |
| <b>7</b>  | Physiological/clinical | Pain                                                              | New onset or worsening of problems related to uncomfortable feelings in the body that can include sharp or burning pain, dull ache, or stinging or throbbing feeling, pain that comes and goes                                            |
| <b>8</b>  | Physiological/clinical | Sleep-related functioning, symptoms, and conditions               | New onset or worsening of problems with falling or staying asleep, need for sleeping medications/aids, excessive sleepiness, or lack of refreshing sleep/poor sleep quality                                                               |
| <b>9</b>  | Physiological/clinical | Nervous system functioning, symptoms, and conditions              | New onset or worsening of dizziness, fainting, headache, tremors/shaking, seizures/fits, tingling feelings, muscle twitching, decreased sensation, stroke, inability to move part of the body, lack of coordination, or speech difficulty |
| <b>10</b> | Physiological/clinical | Cognitive functioning, symptoms, and conditions                   | New onset or worsening problems with memory, communication, concentration, or understanding instructions                                                                                                                                  |
| <b>11</b> | Physiological/clinical | Mental functioning, symptoms, and conditions                      | New onset or worsening problems with emotions and mood, including anxiety/worrying, panic attacks, depression, suicidal thoughts, or post-traumatic stress disorder                                                                       |
| <b>12</b> | Physiological/clinical | Taste- and/or smell-related functioning, symptoms, and conditions | New onset or worsening problems with altered or reduced/loss of taste or smell (e.g., familiar things smell or taste bad or different)                                                                                                    |
| <b>13</b> | Physiological/clinical | Kidney and urinary-related functioning, symptoms, and conditions  | New onset or worsening problems with kidney function or need for dialysis, or problems with urination (i.e., wee/pee) including infections, burning or stinging, higher frequency or urgency                                              |
| <b>14</b> | Physiological/clinical | Reproductive and sexual functioning, symptoms, and conditions     | New onset or worsening problems with menstrual periods, infertility (i.e., ability to make a baby), desire for sex, ability to have sex, or discomfort during sex                                                                         |

|    |                        |                                                                      |                                                                                                                                                                                                                                           |
|----|------------------------|----------------------------------------------------------------------|-------------------------------------------------------------------------------------------------------------------------------------------------------------------------------------------------------------------------------------------|
| 15 | Physiological/clinical | Respiratory functioning, symptoms, and conditions                    | New onset or worsening problems with lungs or breathing (e.g., shortness of breath, chest tightness, or coughing)                                                                                                                         |
| 16 | Physiological/clinical | Skin, hair and/or nail-related functioning, symptoms, and conditions | New onset or worsening problems with ulcers, skin rash, itch, red spots or lumps on toes (COVID toes), hair thinning/loss, changes in nails                                                                                               |
| 17 | Life impact            | Physical functioning, symptoms, and conditions                       | New onset or worsening problems with physical abilities, including muscle strength, arm/leg shaking or unsteadiness, walking, dressing, or eating.                                                                                        |
| 18 | Life impact            | Social role-functioning and relationships problems                   | New onset or worsening problems with connecting with others, maintaining friendships and romantic relationship                                                                                                                            |
| 19 | Life impact            | Work/occupational changes and study                                  | New onset or worsening problems with being able to resume work, study or activities/hobbies                                                                                                                                               |
| 20 | Life impact            | Stigma                                                               | Fear or experiences of being discriminated against, including by employer, medical professionals, family/friends/neighbours, or others                                                                                                    |
| 21 | Life impact            | Satisfaction with life, or personal enjoyment                        | Satisfaction with life, or personal enjoyment, loss of being the person who you were                                                                                                                                                      |
| 22 | Resource use           | Healthcare resource utilisation                                      | Seeing more healthcare professionals (e.g., doctor, physiotherapist, psychologist); taking new medications; returning to the hospital or emergency care; including complementary/alternative medicine (e.g., acupuncturists, naturopaths) |
| 23 | Resource use           | Family/carer burden                                                  | Being a burden on caregiver/family or friends/colleagues; impact of sickness on other people in your life                                                                                                                                 |
| 24 | Physiological/clinical | Post-exertion symptoms*                                              | Worsening of symptoms following physical or mental exertion that can last for a prolonged duration                                                                                                                                        |
| 25 | Physiological/clinical | Muscle and joint symptoms and conditions **                          | New onset or worsening of joint or muscle problems, such as muscle weakness or joint stiffness or swelling                                                                                                                                |
| 26 | Physiological/clinical | Eye symptoms and conditions **                                       | New onset or worsening of eye-related problems, such as visual changes (e.g. blurring, double vision, floaters), itching, dryness or excessive tearing or increased sensitivity to light.                                                 |

\* - an outcome added after people with lived experience representatives review

\*\* - outcomes suggested by Round 1 participants, and rated during Round 2

**Table S6. Full details of Delphi participants.**

|                                                  | <b>Round 1<br/><i>n</i> = 1535</b> | <b>Round 2<br/><i>n</i> = 1148</b> |
|--------------------------------------------------|------------------------------------|------------------------------------|
| <b>Stakeholder group, <i>n</i></b>               |                                    |                                    |
| Person with post COVID-19 condition              | 774                                | 553                                |
| Family member/caregiver                          | 36                                 | 26                                 |
| Health professional with post COVID-19 condition | 148                                | 110                                |
| Researchers with post COVID-19 condition         | 21                                 | 16                                 |
| Health professional                              | 448                                | 350                                |
| Researcher                                       | 108                                | 93                                 |
|                                                  |                                    |                                    |
| <b>Gender, <i>n</i></b>                          |                                    |                                    |
| Male                                             | 392                                | 301                                |
| Female                                           | 1135                               | 841                                |
| Non-binary, other or no answer                   | 6                                  | 4                                  |
| Other                                            | 1                                  | 1                                  |
| Prefer not to answer                             | 1                                  | 1                                  |
|                                                  |                                    |                                    |
| <b>Age group, <i>n</i></b>                       |                                    |                                    |

|                            |     |     |
|----------------------------|-----|-----|
| 18-29                      | 89  | 57  |
| 30-39                      | 404 | 299 |
| 40-49                      | 565 | 423 |
| 50-59                      | 343 | 262 |
| 60-69                      | 119 | 94  |
| 70-79                      | 15  | 13  |
|                            |     |     |
| <b>Countries, <i>n</i></b> |     |     |
| Afghanistan                | 1   | 0   |
| Argentina                  | 13  | 10  |
| Australia                  | 25  | 22  |
| Austria                    | 1   | 1   |
| Belarus                    | 1   | 0   |
| Belgium                    | 12  | 11  |
| Brazil                     | 30  | 22  |
| Burkina Faso               | 1   | 1   |
| Canada                     | 72  | 58  |
| Chile                      | 20  | 12  |



|                              |    |    |
|------------------------------|----|----|
| China                        | 16 | 12 |
| Colombia                     | 8  | 5  |
| Costa Rica                   | 1  | 1  |
| Croatia                      | 1  | 1  |
| Czech Republic               | 1  | 0  |
| Democratic republic of Congo | 1  | 0  |
| Denmark                      | 8  | 7  |
| Ecuador                      | 1  | 0  |
| Egypt                        | 2  | 1  |
| Ethiopia                     | 1  | 1  |
| Finland                      | 5  | 3  |
| France                       | 21 | 19 |
| Gambia                       | 1  | 1  |
| Germany                      | 45 | 39 |
| Ghana                        | 5  | 3  |
| Greece                       | 4  | 2  |
| India                        | 36 | 19 |
| Indonesia                    | 5  | 3  |

|             |    |    |
|-------------|----|----|
| Ireland     | 7  | 5  |
| Israel      | 2  | 1  |
| Italy       | 20 | 13 |
| Ivory Coast | 1  | 1  |
| Japan       | 2  | 2  |
| Kazakhstan  | 5  | 3  |
| Latvia      | 1  | 1  |
| Malawi      | 2  | 2  |
| Malaysia    | 4  | 4  |
| Mali        | 1  | 1  |
| Mauritius   | 1  | 0  |
| Mexico      | 6  | 4  |
| Myanmar     | 1  | 0  |
| Nepal       | 9  | 5  |
| Netherlands | 12 | 10 |
| New Zealand | 4  | 2  |
| Nigeria     | 1  | 1  |
| Norway      | 6  | 6  |

|                     |     |     |
|---------------------|-----|-----|
| Pakistan            | 1   | 1   |
| Panama              | 1   | 0   |
| Peru                | 4   | 3   |
| Philippines         | 2   | 2   |
| Portugal            | 4   | 2   |
| Republic of Korea   | 3   | 3   |
| Republic of Moldova | 2   | 1   |
| Russia              | 33  | 15  |
| Saudi Arabia        | 2   | 1   |
| Singapore           | 1   | 0   |
| South Africa        | 8   | 5   |
| Spain               | 525 | 374 |
| Sri Lanka           | 1   | 1   |
| Sweden              | 5   | 5   |
| Switzerland         | 6   | 4   |
| Tanzania            | 3   | 2   |
| Thailand            | 1   | 1   |
| Turkey              | 2   | 1   |

|                                    |     |     |
|------------------------------------|-----|-----|
| Ukraine                            | 9   | 1   |
| United Arab Emirates               | 3   | 2   |
| United Kingdom                     | 284 | 242 |
| United States of America           | 207 | 163 |
| Venezuela (Bolivarian Republic of) | 1   | 1   |
| Zambia                             | 2   | 1   |
| Zimbabwe                           | 1   | 1   |
| Not specified                      | 1   | 1   |
|                                    |     |     |
| <b>Ethnicity, <i>n</i></b>         |     |     |
| White                              | 975 | 753 |
| South Asian                        | 68  | 47  |
| Hispanic/Latino/Spanish            | 350 | 246 |
| East Asian/Pacific Islander        | 43  | 33  |
| Indigenous peoples                 | 4   | 4   |
| Black                              | 25  | 16  |
| Middle Eastern/North African       | 12  | 10  |
| Other                              | 58  | 39  |

**Table S7. Results following two rounds of Delphi and selection of outcomes for the consensus meeting.**

|                    |          |                                   |           |                | Patients and Family members/Caregivers (n=579) |                            |                      |                        | HPs and Researchers with Long COVID (n=126) |                            |                      | HPs and Researchers without Long COVID (n=443) |                    |                            |                      |               |
|--------------------|----------|-----------------------------------|-----------|----------------|------------------------------------------------|----------------------------|----------------------|------------------------|---------------------------------------------|----------------------------|----------------------|------------------------------------------------|--------------------|----------------------------|----------------------|---------------|
|                    |          |                                   |           |                | Not that important                             | Important but not critical | Critically Important |                        | Not that important                          | Important but not critical | Critically Important |                                                | Not that important | Important but not critical | Critically Important |               |
|                    | Outcome  | Help Text                         | R1 result | Overall result | %1-2                                           | %4-6                       | %7-9                 | Patient/Carer Result P | %1-3                                        | %4-6                       | %7-9                 | HP/Res COVID Result                            | %1-3               | %4-6                       | %7-9                 | HP/Res Result |
| MORTALITY/SURVIVAL | Survival | <i>How long does someone live</i> |           | Discuss        | 6.9                                            | 14.0                       | 79.0                 | Medium                 | 1.6                                         | 12.2                       | 86.2                 | In                                             | 1.1                | 8.9                        | 89.9                 | In            |

|                                |                                                                     |                                                                                                                                                                                                                           |  |                      |      |      |      |        |      |      |      |        |      |      |      |     |
|--------------------------------|---------------------------------------------------------------------|---------------------------------------------------------------------------------------------------------------------------------------------------------------------------------------------------------------------------|--|----------------------|------|------|------|--------|------|------|------|--------|------|------|------|-----|
| <b>PHYSIOLOGICAL/ CLINICAL</b> | <b>Cardiovascular functioning, symptoms and conditions</b>          | <i>New onset or worsening of problems affecting the heart (e.g. pounding or racing heart) and the blood vessels (e.g., veins or arteries), lightheadedness/fainting (including on standing).</i>                          |  | In                   | 3.5  | 16.5 | 80.0 | In     | 2.4  | 3.2  | 94.4 | In     | 0.9  | 10.9 | 88.2 | In  |
|                                | <b>Endocrine and metabolic functioning, symptoms and conditions</b> | <i>New onset or worsening of problems related to the glands that make hormones, hormonal balance (e.g., diabetes, thyroid problems, adrenal gland or steroid problems, changes in body weight, bone mineral problems)</i> |  | Query discuss at end | 6.3  | 20.5 | 73.2 | Medium | 1.6  | 20.2 | 78.2 | Medium | 3.9  | 47.0 | 49.1 | Out |
|                                | <b>Hearing-related functioning, symptoms and conditions</b>         | <i>New onset or worsening of problems with hearing (e.g., hearing loss, ringing or buzzing in the ears ('tinnitus'), increased sensitivity to sounds)</i>                                                                 |  | Out                  | 15.6 | 45.3 | 39.1 | Out    | 10.4 | 46.4 | 43.2 | Out    | 16.1 | 67.3 | 16.6 | Out |
|                                | <b>Gastrointestinal functioning, symptoms and conditions</b>        | <i>New onset or worsening of problems with stomach aches, nausea (feeling sick)/vomiting, diarrhea, malabsorption, constipation, gas, or indigestion (heartburn), appetite or weight change</i>                           |  | Query discuss at end | 5.4  | 24.3 | 70.3 | Medium | 0.8  | 24.0 | 75.2 | Medium | 4.8  | 58.5 | 36.6 | Out |

|                                                            |                                                                                                                                                                                                                                        |    |         |     |      |      |        |     |      |      |    |     |      |      |        |
|------------------------------------------------------------|----------------------------------------------------------------------------------------------------------------------------------------------------------------------------------------------------------------------------------------|----|---------|-----|------|------|--------|-----|------|------|----|-----|------|------|--------|
| <b>Fatigue or Exhaustion</b>                               | <i>New onset or worsening in severity or duration of feeling exhausted, having too little energy, or needing more rest</i>                                                                                                             | In | In      | 0.9 | 5.5  | 93.7 | In     | 0.0 | 0.8  | 99.2 | In | 0.0 | 4.8  | 95.2 | In     |
| <b>Pain</b>                                                | <i>New onset or worsening of problems related to uncomfortable feelings in the body that can include sharp or burning pain, dull ache, or stinging or throbbing feeling, pain that comes and goes</i>                                  |    | In      | 3.2 | 14.0 | 82.8 | In     | 0.0 | 8.0  | 92.0 | In | 1.1 | 17.7 | 81.2 | In     |
| <b>Sleep-related functioning, symptoms and conditions</b>  | <i>New onset or worsening of problems with falling or staying asleep, need for sleeping medications/aids, excessive sleepiness, or lack of refreshing sleep/poor sleep quality</i>                                                     |    | Discuss | 2.1 | 18.0 | 79.9 | Medium | 0.8 | 12.0 | 87.2 | In | 1.1 | 23.5 | 75.3 | Medium |
| <b>Nervous system functioning, symptoms and conditions</b> | <i>New onset or worsening of dizziness, fainting, headache, tremors/shaking, seizures/fits, tingling feelings, decreased sensation, stroke, inability to move part of the body, lack of coordination/balance or speech difficulty.</i> |    | In      | 1.2 | 9.5  | 89.3 | In     | 0.8 | 4.8  | 94.4 | In | 0.5 | 12.7 | 86.9 | In     |
| <b>Cognitive functioning, symptoms and conditions</b>      | <i>New onset or worsening problems with memory, communication, concentration, or understanding instructions</i>                                                                                                                        | In | In      | 1.7 | 11.9 | 86.4 | In     | 0.0 | 3.2  | 96.8 | In | 0.7 | 4.5  | 94.8 | In     |

|                                                                         |                                                                                                                                                                                                        |     |                      |      |      |      |        |     |      |      |        |     |      |      |     |
|-------------------------------------------------------------------------|--------------------------------------------------------------------------------------------------------------------------------------------------------------------------------------------------------|-----|----------------------|------|------|------|--------|-----|------|------|--------|-----|------|------|-----|
| <b>Mental functioning, symptoms and conditions</b>                      | <i>New onset or worsening problems with emotions and mood, including anxiety/worrying, avoidance, catastrophizing, panic attacks, depression, suicidal thoughts, or post-traumatic stress disorder</i> | In  | In                   | 3.8  | 11.9 | 84.3 | In     | 0.8 | 7.2  | 92.0 | In     | 0.0 | 5.6  | 94.4 | In  |
| <b>Taste- and/or smell-related functioning, symptoms and conditions</b> | <i>New onset or worsening problems with altered or reduced/loss of taste or smell (e.g., familiar things smell or taste bad or different)</i>                                                          |     | Out                  | 19.7 | 43.2 | 37.1 | Out    | 5.6 | 52.4 | 42.1 | Out    | 5.9 | 61.9 | 32.2 | Out |
| <b>Kidney and urinary-related functioning, symptoms and conditions</b>  | <i>New onset or worsening problems with kidney function or need for dialysis, or problems with urination (i.e., wee/pee) including infections, burning or stinging, higher frequency or urgency</i>    |     | Query discuss at end | 16.0 | 33.3 | 50.7 | Medium | 8.7 | 33.3 | 57.9 | Medium | 7.5 | 56.9 | 35.7 | Out |
| <b>Reproductive and sexual functioning, symptoms and conditions</b>     | <i>New onset or worsening problems with menstrual periods, infertility (i.e., ability to make a baby), desire for sex, ability to have sex, or discomfort during sex</i>                               | Out | Out                  | 17.5 | 41.3 | 41.3 | Out    | 9.5 | 50.0 | 40.5 | Out    | 9.7 | 66.0 | 24.4 | Out |
| <b>Respiratory functioning; symptoms; and conditions</b>                | <i>New onset or worsening problems with lungs or breathing (e.g., shortness of breath, chest tightness or coughing)</i>                                                                                | In  | In                   | 3.8  | 11.6 | 84.5 | In     | 0.8 | 4.8  | 94.4 | In     | 0.0 | 3.4  | 96.6 | In  |



|                    |                                                                            |                                                                                                                                                    |     |                      |      |      |      |        |     |      |      |        |      |      |      |        |
|--------------------|----------------------------------------------------------------------------|----------------------------------------------------------------------------------------------------------------------------------------------------|-----|----------------------|------|------|------|--------|-----|------|------|--------|------|------|------|--------|
|                    | <b>Skin; hair and/or nail-related functioning, symptoms and conditions</b> | <i>New onset or worsening problems with ulcers, skin rash, itch, red spots or lumps on toes (COVID toes), hair thinning/loss, changes in nails</i> | Out | Out                  | 12.2 | 44.7 | 43.1 | Out    | 6.4 | 52.0 | 41.6 | Out    | 19.6 | 65.6 | 14.8 | Out    |
| <b>LIFE IMPACT</b> | <b>Physical functioning; symptoms; and conditions</b>                      | <i>New onset or worsening problems with physical abilities, such as walking, dressing, or eating</i>                                               |     | In                   | 0.5  | 8.7  | 90.8 | In     | 0.0 | 3.2  | 96.8 | In     | 0.0  | 2.0  | 98.0 | In     |
|                    | <b>Social role-functioning and relationships problems</b>                  | <i>New onset or worsening problems with connecting with others, maintaining friendships and romantic relationship</i>                              | In  | Query discuss at end | 4.9  | 29.8 | 65.3 | Medium | 2.4 | 19.2 | 78.4 | Medium | 1.1  | 22.9 | 76.0 | Medium |
|                    | <b>Work/occupational changes and study</b>                                 | <i>New onset or worsening problems with being able to resume work, study or activities/hobbies</i>                                                 |     | In                   | 2.1  | 10.5 | 87.4 | In     | 0.0 | 7.2  | 92.8 | In     | 0.7  | 11.2 | 88.2 | In     |
|                    | <b>Stigma</b>                                                              | <i>Fear or experiences of being discriminated against, including by employer, medical professionals, family/friends/neighbours, or others</i>      |     | Out                  | 11.3 | 39.3 | 49.4 | Out    | 5.6 | 46.4 | 48.0 | Out    | 12.6 | 63.0 | 24.4 | Out    |

|                                |                                                      |                                                                                                                                                                                                                                                  |     |                      |      |      |      |        |     |      |      |        |      |      |      |        |
|--------------------------------|------------------------------------------------------|--------------------------------------------------------------------------------------------------------------------------------------------------------------------------------------------------------------------------------------------------|-----|----------------------|------|------|------|--------|-----|------|------|--------|------|------|------|--------|
|                                | <b>Satisfaction with life; or personal enjoyment</b> | <i>Satisfaction with life, or personal enjoyment, loss of being the person who you were</i>                                                                                                                                                      | Out | Discuss              | 2.1  | 18.2 | 79.7 | Medium | 0.0 | 16.1 | 83.9 | In     | 0.7  | 23.6 | 75.7 | Medium |
| <b>RESOURCE USE</b>            | <b>Healthcare resource utilisation</b>               | <i>Seeing more healthcare professionals (e.g., doctor, physiotherapist, psychologist); taking new medications; returning to the hospital or emergency care; including complimentary/alternative medicine (e.g., acupuncturists, naturopaths)</i> |     | Discuss              | 2.5  | 20.2 | 77.3 | Medium | 0.8 | 18.7 | 80.5 | In     | 0.7  | 24.7 | 74.7 | Medium |
|                                | <b>Family/carer burden</b>                           | <i>Being a burden on caregiver/family or friends/colleagues; impact of sickness on other people in your life</i>                                                                                                                                 |     | Query discuss at end | 5.9  | 27.5 | 66.6 | Medium | 4.0 | 19.2 | 76.8 | Medium | 1.1  | 30.4 | 68.5 | Medium |
| <b>PHYSIOLOGICAL/ CLINICAL</b> | <b>Post-exertion symptoms</b>                        | <i>Worsening of symptoms following physical or mental exertion that can last for a prolonged duration</i>                                                                                                                                        |     | In                   | 0.7  | 6.9  | 92.4 | In     | 0.0 | 4.8  | 95.2 | In     | 0.5  | 12.6 | 86.9 | In     |
|                                | <b>Eye symptoms and conditions</b>                   | <i>New onset or worsening of eye-related problems, such as visual changes (e.g. blurring, double vision, floaters), itching, dryness or excessive tearing or increased sensitivity to light</i>                                                  |     | Query discuss at end | 10.1 | 30.0 | 59.9 | Medium | 4.0 | 48.8 | 47.2 | Out    | 15.3 | 62.8 | 21.8 | Out    |

|                             |                                                 |                                                                                                                   |          |                |     |      |      |    |     |      |      |    |     |      |      |        |
|-----------------------------|-------------------------------------------------|-------------------------------------------------------------------------------------------------------------------|----------|----------------|-----|------|------|----|-----|------|------|----|-----|------|------|--------|
|                             | <b>Muscle and joint symptoms and conditions</b> | <i>New onset or worsening of joint or muscle problems, such as muscle weakness or joint stiffness or swelling</i> |          | <b>Discuss</b> | 3.5 | 15.3 | 81.1 | In | 0.0 | 15.2 | 84.8 | In | 2.1 | 37.6 | 60.3 | Medium |
| <b>Total</b>                |                                                 |                                                                                                                   |          |                |     |      |      |    |     |      |      |    |     |      |      |        |
| <b>In</b>                   |                                                 |                                                                                                                   | <b>5</b> | <b>10</b>      |     |      |      |    |     |      |      |    |     |      |      |        |
| <b>Out</b>                  |                                                 |                                                                                                                   | <b>3</b> | <b>5</b>       |     |      |      |    |     |      |      |    |     |      |      |        |
| <b>Discuss</b>              |                                                 |                                                                                                                   |          | <b>5</b>       |     |      |      |    |     |      |      |    |     |      |      |        |
| <b>Query discuss at end</b> |                                                 |                                                                                                                   |          | <b>6</b>       |     |      |      |    |     |      |      |    |     |      |      |        |

**Table S8. Attrition between Rounds one and two.**

| <b>Stakeholder</b>                                                       | <b>Number registered (% of total registrations)</b> | <b>Completed R1 n (% of registrations)</b> | <b>Number of participants invited to R2*</b> | <b>Completed R2 n (% of completed R1 and invited to R2)</b> |
|--------------------------------------------------------------------------|-----------------------------------------------------|--------------------------------------------|----------------------------------------------|-------------------------------------------------------------|
| People with long COVID/post COVID condition and their and Carers         | 912 (54)                                            | 810 (89)                                   | 807                                          | 579 (72)                                                    |
| Health professional and Researchers with Long COVID/Post-COVID condition | 191 (11)                                            | 169 (88)                                   | 169                                          | 126 (75)                                                    |
| Health professional and Researchers (without COVID)                      | 589 (35)                                            | 556 (94)                                   | 554                                          | 443 (80)                                                    |
|                                                                          |                                                     |                                            |                                              |                                                             |
| Total                                                                    | 1692                                                | 1535 (91)                                  | 1530*                                        | 1148                                                        |

\*This figure takes into account participants who could not be reached because of mail delivery failures (n=5)

**Table S9. Consensus meeting participants.**

|                                                                                                                                                                                                                                | N (%)           |
|--------------------------------------------------------------------------------------------------------------------------------------------------------------------------------------------------------------------------------|-----------------|
| <b>Healthcare professionals/Researchers</b>                                                                                                                                                                                    | <b>15 (100)</b> |
| <b>Delphi stakeholder group</b>                                                                                                                                                                                                |                 |
| Health professional (including those who also do research) <sup>1</sup>                                                                                                                                                        | 10 (67)         |
| Researcher (without any clinical patient care duties) <sup>2</sup>                                                                                                                                                             | 4 (26)          |
| Health professional with Long COVID/Post-COVID condition <sup>1</sup>                                                                                                                                                          | 1 (7)           |
| <b>Country of residence</b>                                                                                                                                                                                                    |                 |
| Belgium                                                                                                                                                                                                                        | 1 (7)           |
| Brazil                                                                                                                                                                                                                         | 1 (7)           |
| Canada                                                                                                                                                                                                                         | 1 (7)           |
| Chile                                                                                                                                                                                                                          | 1 (7)           |
| Ghana                                                                                                                                                                                                                          | 1 (7)           |
| India                                                                                                                                                                                                                          | 2 (13)          |
| Nigeria                                                                                                                                                                                                                        | 1 (7)           |
| Norway                                                                                                                                                                                                                         | 1 (7)           |
| Russia                                                                                                                                                                                                                         | 1 (7)           |
| Sweden                                                                                                                                                                                                                         | 1 (7)           |
| Switzerland                                                                                                                                                                                                                    | 1 (7)           |
| UK                                                                                                                                                                                                                             | 1 (7)           |
| USA                                                                                                                                                                                                                            | 2 (13)          |
|                                                                                                                                                                                                                                |                 |
| <b>People with long COVID and their carers</b>                                                                                                                                                                                 | <b>12 (100)</b> |
| <b>Delphi stakeholder Group</b>                                                                                                                                                                                                |                 |
| Person with Long COVID/Post-COVID Condition                                                                                                                                                                                    | 7 (58)          |
| Family member/caregiver of person with Long COVID/Post-COVID Condition                                                                                                                                                         | 1 (8)           |
| Health professional with Long COVID/Post-COVID condition <sup>3</sup>                                                                                                                                                          | 4 (33)          |
|                                                                                                                                                                                                                                |                 |
| <b>Country of residence</b>                                                                                                                                                                                                    |                 |
| Belgium                                                                                                                                                                                                                        | 1 (8)           |
| Greece                                                                                                                                                                                                                         | 1 (8)           |
| Ireland                                                                                                                                                                                                                        | 1 (8)           |
| Spain                                                                                                                                                                                                                          | 1 (8)           |
| UK                                                                                                                                                                                                                             | 7 (58)          |
| USA                                                                                                                                                                                                                            | 1 (8)           |
| <sup>1</sup> Health professionals who care for people with long COVID<br><sup>2</sup> Researchers who undertake research in long COVID<br><sup>3</sup> Health professionals who do not provide care for people with long COVID |                 |

**Table S10. Delphi process and Consensus meeting results.**

| Domain                                   | Outcome                                            | Outcome description                                                                                                                                                                                                                       | % people with long COVID rating 7-9 in the online Delphi                                                                                                                    | %HCPs/ researchers with long COVID voting 7-9 in the online Delphi | % HCPs /researchers voting 7-9 in the online Delphi | % people with long COVID voting 7-9 in consensus meeting | % HCPs voting 7-9 in consensus meeting | Result                  |
|------------------------------------------|----------------------------------------------------|-------------------------------------------------------------------------------------------------------------------------------------------------------------------------------------------------------------------------------------------|-----------------------------------------------------------------------------------------------------------------------------------------------------------------------------|--------------------------------------------------------------------|-----------------------------------------------------|----------------------------------------------------------|----------------------------------------|-------------------------|
| <b>Mortality outcomes</b>                | Survival                                           | How long does someone live                                                                                                                                                                                                                | 79                                                                                                                                                                          | 86                                                                 | 90                                                  | 83                                                       | 92                                     | Included in the COS     |
|                                          | <b>Physiological/clinical outcomes</b>             | Sleep-related functioning, symptoms and conditions                                                                                                                                                                                        | New onset or worsening of problems with falling or staying asleep, need for sleeping medications/aids, excessive sleepiness, or lack of refreshing sleep/poor sleep quality | 80                                                                 | 87                                                  | 75                                                       | 75                                     | 64                      |
| Muscle and joint symptoms and conditions |                                                    | New onset or worsening of joint or muscle problems, such as muscle weakness or joint stiffness or swelling                                                                                                                                | 81                                                                                                                                                                          | 85                                                                 | 60                                                  | 92                                                       | 25                                     | Not included in the COS |
| <b>Life impact outcomes</b>              | Satisfaction with life or personal enjoyment       | Satisfaction with life, or personal enjoyment, loss of being the person who you were                                                                                                                                                      | 80                                                                                                                                                                          | 84                                                                 | 76                                                  | 42                                                       | 27                                     | Not included in the COS |
|                                          | Social role functioning and relationships problems | New onset or worsening problems with connecting with others, maintaining friendships and romantic relationship                                                                                                                            | 65                                                                                                                                                                          | 78                                                                 | 76                                                  | 25                                                       | 18                                     | Not included in the COS |
| <b>Resource use outcomes</b>             | Family/carer burden                                | Being a burden on caregiver/family or friends/colleagues; impact of sickness on other people in your life                                                                                                                                 | 67                                                                                                                                                                          | 77                                                                 | 69                                                  | 33                                                       | 36                                     | Not included in the COS |
|                                          | Healthcare resource utilisation                    | Seeing more healthcare professionals (e.g., doctor, physiotherapist, psychologist); taking new medications; returning to the hospital or emergency care; including complementary/alternative medicine (e.g., acupuncturists, naturopaths) | 77                                                                                                                                                                          | 81                                                                 | 75                                                  | 92                                                       | 73                                     | in the COS              |

**Table S11. Participants wishing to be acknowledged.**

|                           |
|---------------------------|
| Adriana                   |
| Africa Martínez Amezcua   |
| Aitana                    |
| Alba                      |
| Alejandra Sánchez Alonso  |
| Alicia                    |
| Alicia Claver Lacruz      |
| Ana                       |
| Ana Isabel Arroba Rocha   |
| Ana Isabel Casas Novellón |
| Ana Isabel Rodríguez      |
| Ana Lacalle Henche        |
| Ana María                 |
| Ana María Blasco Catalán  |
| Angela Castaño Ruiz       |
| Angela Morales Elbaz      |
| Antonio Martín Castillejo |
| Aránzazu Angel            |
| Ascension                 |
| Beatriz                   |
| Beatriz                   |
| Begoña Puges Comas        |
| Begoña Ruiz               |
| Carlos                    |
| Carlos a. Alvarez-Moreno  |
| Carlos Sierra Sahun       |
| Carne Navarrete           |
| Carmen Fernandez          |

|                           |
|---------------------------|
| Carmen Gimeno Zamora      |
| Carmen Molina             |
| Carmen Tejero Cano        |
| Carolina                  |
| Carolina Daneyko Marinas  |
| Carolina Foster           |
| Castro Horacio Matías     |
| Cesareo Moreno Pérez      |
| Charo                     |
| Concepcion Martín Cortijo |
| Cristina Arnáiz Domínguez |
| Cristina Garcia           |
| Cristina Gomez Cativiela  |
| Cristina Hernandez Puente |
| Daniel López Fernández    |
| Danizza Valencia Lazo     |
| Desirée                   |
| Diego                     |
| Dolores Trevejo Esteban   |
| Dr Carola Flurschütz      |
| Elena                     |
| Elena Garcia              |
| Elena Pérez-Velasco       |
| Elizabeth Semper          |
| Emlpegsagl@gmail.com      |
| Emma                      |
| Enrique Noguero Rodríguez |
| Estela                    |
| Esther Moya Clemente      |
| Esther Rodríguez          |



|                                    |
|------------------------------------|
| Estrella                           |
| Eva                                |
| Eva M Palacian Monzon              |
| Eva María Martín Martínez          |
| Fatima                             |
| Federico Carini                    |
| Felipe Araya Casanova              |
| Fernando Elosúa                    |
| Francisca Madrid Botello           |
| Francisco Sánchez Ruiz             |
| Francy Cantor-Cruz                 |
| Gabriela Delsignore                |
| Gema Marián González González      |
| Gemma Sáez Ons                     |
| GiovaniI Assuncao De Azevedo Alves |
| Giuliana María Pesaresi            |
| Gonzalo Queipo                     |
| Inma Pérez del Toro                |
| Inmaculada Samaniego Galan         |
| Isabel                             |
| Isabel Herreros                    |
| Isabelle Delez                     |
| Itziar                             |
| Ivan                               |
| Javier                             |
| Javier Pacho Sánchez               |
| Joan                               |
| Jordi Rello                        |
| Jorge                              |
| José                               |

|                                      |
|--------------------------------------|
| Jose Andres Calvache                 |
| José Antonio Martín Quero            |
| Jose F. Parodi                       |
| José Ignacio Ruiz Serrano            |
| José Jacinto                         |
| Jose Zuccoli                         |
| Josep Oriol Mesa Rey                 |
| Josep Ortega                         |
| Juan                                 |
| Juan José Lòpez Cantero              |
| Judit Vidal Marimon                  |
| Julia García Morán                   |
| Julieta                              |
| Kristina Jausoro Alzola              |
| Ladislao Diaz Ballve                 |
| Laura rapela                         |
| Leidy Depestre Benitez               |
| Lidia                                |
| Loretta                              |
| Luis Antonio Gorordo-Delsol          |
| Luis D Capacete Novo                 |
| Luis González Argomániz              |
| M Jose                               |
| M Victoria Perez                     |
| M. Pietat Espin                      |
| M <sup>a</sup> Dolores Garcia Llamas |
| Maira Cuello                         |
| Maite                                |
| Manuel Prieto                        |
| Manuela                              |

|                                          |
|------------------------------------------|
| Mar Ariza                                |
| Mar Lefort                               |
| Mar Sendra                               |
| Marcela                                  |
| Marga Flores                             |
| Maria                                    |
| Maria                                    |
| Maria Aida Alzola Medina                 |
| María Almagro Del Rosal                  |
| María Angeles Rodríguez de Guzmán Moreno |
| Maria De Los Angeles Diaz Garrido        |
| Maria Del Mar Racero                     |
| María Dolores                            |
| María Dolores Dominguez Cáceres          |
| Maria Dolores Peleato Catalan            |
| María Esther Franco Carranza             |
| María Eugenia Díez Moreno                |
| María Eugenia Prieto Calonge             |
| Maria Gracia Sánchez Ruiz                |
| María Jesús Bermúdez Rivero              |
| Maria Luisa Costa Talavera               |
| Maria Montoya Martínez                   |
| María Noël Zucco Solari                  |
| Maria Pilar Uruen Pelegrin               |
| Marie-Claire                             |
| Marimar Sánchez Perez                    |
| Marína Ibañez                            |
| Mario                                    |
| Mario Hurtado Donaire                    |
| Marisa Milla Ibañez                      |

|                             |
|-----------------------------|
| Marta                       |
| Marta Arranz Cárcamo        |
| Marta Begueria Sopesens     |
| Marta Castro García         |
| Marta Fuentes               |
| Marta Isabel Casas Santiago |
| Marta Sanguino López        |
| Marta Villafañez            |
| Mary                        |
| Mercedes                    |
| Mercedes Sánchez Sancho     |
| Mertxe                      |
| Milagros Del Pino Nieto     |
| Miriam                      |
| Miriam                      |
| Miriam Jesica Martin Duran  |
| Monica                      |
| Monica Condominas Pich      |
| Montse Alcolado             |
| Montserrat Canal            |
| Myrian Brun                 |
| Natalia Reina               |
| Nicolasa Ramirez Torres     |
| Nieves Camara               |
| Nuria                       |
| Nuria                       |
| Nuria                       |
| Nuria Tabuenca Prat         |
| Patricia                    |
| Patricia D.R.               |

|                           |
|---------------------------|
| Patricia Garcia Gomez     |
| Pavel Contreras           |
| Paz TI                    |
| Pilar                     |
| Pilar                     |
| Pilar del aguila          |
| Pilar Suarez García       |
| Pilar Yagüe Sebastian     |
| Rafael                    |
| Raquel                    |
| Raquel Anton Boada        |
| Raquel Valls              |
| Raül                      |
| Rebeca                    |
| Ricardo Allegri           |
| Rocío Biedma Romero       |
| Roger Paredes             |
| Rosa María Alvarez Bernal |
| Rosa María San Martin     |
| Rosa Puerta Alonso        |
| Rosana Prados Román       |
| Rosario Arias             |
| Ruben Garcia Sanchez      |
| Ruth Lobo                 |
| Sabrina                   |
| Sagrario                  |
| Sandra                    |
| Sandra González Muñoz     |
| Sandra Muñoz              |
| Sandra RG                 |

|                         |
|-------------------------|
| Sara                    |
| Sara Lancho             |
| Seila Torrón Domínguez  |
| Sheyla                  |
| Silvia                  |
| Silvia Sanz Arumí       |
| Sofía                   |
| Susanne Kessler         |
| Tatiana                 |
| Teresa Villani          |
| Vanesa                  |
| Vanessa                 |
| Vanessa                 |
| Veronica Rojas Jara     |
| Viginia Martínez Buelga |
| Yanine Perez            |
| Yolanda                 |
